# Supplementary material for: Broad-spectrum of non-serious adverse events following COVID-19 vaccination: A population-based cohort study in Seoul, South Korea
Source: bioRxiv or medRxiv preprint supplement (doi:10.1101/2023.11.15.23298566), 2024-03-07
Supplement: Supplementary file [file media-1.pdf]

Supplement table S1. The cumulative incidence rates of non-fatal immune-related adverse events stratified by gender

| Disease             | Gender | Vaccination | total  | One week |      |           |        | Two weeks |       |             |        | One month |       |             |        | Three months |       |             |        |
|---------------------|--------|-------------|--------|----------|------|-----------|--------|-----------|-------|-------------|--------|-----------|-------|-------------|--------|--------------|-------|-------------|--------|
|                     |        |             |        | event    | IR   | 95% CI    | P      | event     | IR    | 95% CI      | P      | event     | IR    | 95% CI      | P      | event        | IR    | 95% CI      | P      |
| Endometriosis       | Male   | No          | 143128 |          |      |           |        |           |       |             |        |           |       |             |        |              |       |             |        |
|                     |        | Yes         | 718173 |          |      |           |        |           |       |             |        |           |       |             |        |              |       |             |        |
|                     | Female | No          | 146448 | 4        | 0.27 | 0.01-0.54 | 0.389  | 13        | 0.89  | 0.41-1.37   | 0.877  | 35        | 2.39  | 1.60-3.18   | 0.703  | 99           | 6.76  | 5.43-8.09   | 0.164  |
|                     |        | Yes         | 740384 | 34       | 0.46 | 0.30-0.61 |        | 63        | 0.85  | 0.64-1.06   |        | 165       | 2.23  | 1.89-2.57   |        | 584          | 7.89  | 7.25-8.53   |        |
| Menstrual disorder  | Male   | No          | 143128 |          |      |           |        |           |       |             |        |           |       |             |        |              |       |             |        |
|                     |        | Yes         | 718173 |          |      |           |        |           |       |             |        |           |       |             |        |              |       |             |        |
|                     | Female | No          | 146448 | 82       | 5.6  | 4.39-6.81 | 0.638  | 161       | 10.99 | 9.30-12.69  | 0.112  | 346       | 23.63 | 21.14-26.11 | 0.003  | 1025         | 69.99 | 65.72-74.26 | <0.001 |
|                     |        | Yes         | 740384 | 442      | 5.97 | 5.41-6.53 |        | 935       | 12.63 | 11.82-13.44 |        | 2081      | 28.11 | 26.90-29.31 |        | 6481         | 87.54 | 85.41-89.66 |        |
| Bruise              | Male   | No          | 143128 | 1        | 0.07 | 0.00-0.21 | 0.007  | 2         | 0.14  | 0.00-0.33   | 0.001  | 3         | 0.21  | 0.00-0.45   | <0.001 | 17           | 1.19  | 0.62-1.75   | <0.001 |
|                     |        | Yes         | 718173 | 42       | 0.58 | 0.41-0.76 |        | 65        | 0.91  | 0.69-1.13   |        | 108       | 1.5   | 1.22-1.79   |        | 218          | 3.04  | 2.63-3.44   |        |
|                     | Female | No          | 146448 | 3        | 0.2  | 0.00-0.44 | 0.005  | 4         | 0.27  | 0.01-0.54   | <0.001 | 8         | 0.55  | 0.17-0.92   | <0.001 | 31           | 2.12  | 1.37-2.86   | <0.001 |
|                     |        | Yes         | 740384 | 65       | 0.88 | 0.66-1.09 |        | 116       | 1.57  | 1.28-1.85   |        | 179       | 2.42  | 2.06-2.77   |        | 341          | 4.61  | 4.12-5.09   |        |
| Herpes zoster       | Male   | No          | 143128 | 8        | 0.56 | 0.17-0.95 | <0.001 | 21        | 1.47  | 0.84-2.09   | <0.001 | 59        | 4.12  | 3.07-5.17   | <0.001 | 179          | 12.51 | 10.68-14.34 | <0.001 |
|                     |        | Yes         | 718173 | 188      | 2.62 | 2.24-2.99 |        | 411       | 5.72  | 5.17-6.28   |        | 907       | 12.63 | 11.81-13.45 |        | 2641         | 36.77 | 35.37-38.17 |        |
|                     | Female | No          | 146448 | 23       | 1.57 | 0.93-2.21 | <0.001 | 45        | 3.07  | 2.18-3.97   | <0.001 | 103       | 7.03  | 5.68-8.39   | <0.001 | 275          | 18.78 | 16.56-21.00 | <0.001 |
|                     |        | Yes         | 740384 | 284      | 3.84 | 3.39-4.28 |        | 644       | 8.7   | 8.03-9.37   |        | 1363      | 18.41 | 17.43-19.39 |        | 3934         | 53.13 | 51.48-54.79 |        |
| Alopecia            | Male   | No          | 143128 | 2        | 0.14 | 0.00-0.33 | 0.053  | 5         | 0.35  | 0.04-0.66   | 0.047  | 11        | 0.77  | 0.31-1.22   | 0.001  | 38           | 2.65  | 1.81-3.50   | <0.001 |
|                     |        | Yes         | 718173 | 38       | 0.53 | 0.36-0.70 |        | 62        | 0.86  | 0.65-1.08   |        | 143       | 1.99  | 1.66-2.32   |        | 373          | 5.19  | 4.67-5.72   |        |
|                     | Female | No          | 146448 | 4        | 0.27 | 0.01-0.54 | 1      | 5         | 0.34  | 0.04-0.64   | 0.064  | 12        | 0.82  | 0.36-1.28   | 0.015  | 42           | 2.87  | 2.00-3.74   | <0.001 |
|                     |        | Yes         | 740384 | 23       | 0.31 | 0.18-0.44 |        | 60        | 0.81  | 0.61-1.02   |        | 123       | 1.66  | 1.37-1.95   |        | 393          | 5.31  | 4.78-5.83   |        |
| Warts               | Male   | No          | 143128 | 9        | 0.63 | 0.22-1.04 | 0.286  | 14        | 0.98  | 0.47-1.49   | 0.003  | 40        | 2.79  | 1.93-3.66   | <0.001 | 103          | 7.2   | 5.81-8.59   | <0.001 |
|                     |        | Yes         | 718173 | 68       | 0.95 | 0.72-1.17 |        | 156       | 2.17  | 1.83-2.51   |        | 349       | 4.86  | 4.35-5.37   |        | 983          | 13.69 | 12.83-14.54 |        |
|                     | Female | No          | 146448 | 11       | 0.75 | 0.31-1.19 | 0.649  | 16        | 1.09  | 0.56-1.63   | 0.02   | 38        | 2.59  | 1.77-3.42   | 0.005  | 94           | 6.42  | 5.12-7.72   | <0.001 |
|                     |        | Yes         | 740384 | 67       | 0.9  | 0.69-1.12 |        | 147       | 1.99  | 1.66-2.31   |        | 309       | 4.17  | 3.71-4.64   |        | 828          | 11.18 | 10.42-11.94 |        |
| Visual impairment   | Male   | No          | 143128 | 0        | 0    | 0.00-0.00 | 1      | 0         | 0     | 0.00-0.00   | 0.598  | 0         | 0     | 0.00-0.00   | 0.154  | 0            | 0     | 0.00-0.00   | 0.006  |
|                     |        | Yes         | 718173 | 3        | 0.04 | 0.00-0.09 |        | 6         | 0.08  | 0.02-0.15   |        | 15        | 0.21  | 0.10-0.31   |        | 31           | 0.43  | 0.28-0.58   |        |
|                     | Female | No          | 146448 | 0        | 0    | 0.00-0.00 | 1      | 0         | 0     | 0.00-0.00   | 1      | 0         | 0     | 0.00-0.00   | 0.368  | 2            | 0.14  | 0.00-0.33   | 0.561  |
|                     |        | Yes         | 740384 | 2        | 0.03 | 0.00-0.06 |        | 3         | 0.04  | 0.00-0.09   |        | 8         | 0.11  | 0.03-0.18   |        | 19           | 0.26  | 0.14-0.37   |        |
| Glaucoma            | Male   | No          | 143128 | 11       | 0.77 | 0.31-1.22 | <0.001 | 28        | 1.96  | 1.23-2.68   | <0.001 | 78        | 5.45  | 4.24-6.66   | <0.001 | 216          | 15.09 | 13.08-17.10 | <0.001 |
|                     |        | Yes         | 718173 | 198      | 2.76 | 2.37-3.14 |        | 393       | 5.47  | 4.93-6.01   |        | 849       | 11.82 | 11.03-12.62 |        | 2556         | 35.59 | 34.21-36.97 |        |
|                     | Female | No          | 146448 | 32       | 2.19 | 1.43-2.94 | 0.056  | 52        | 3.55  | 2.59-4.52   | <0.001 | 121       | 8.26  | 6.79-9.73   | <0.001 | 318          | 21.71 | 19.33-24.10 | <0.001 |
|                     |        | Yes         | 740384 | 232      | 3.13 | 2.73-3.54 |        | 508       | 6.86  | 6.26-7.46   |        | 1043      | 14.09 | 13.23-14.94 |        | 3193         | 43.13 | 41.63-44.62 |        |
| Tinnitus            | Male   | No          | 143128 | 5        | 0.35 | 0.04-0.66 | 0.197  | 12        | 0.84  | 0.36-1.31   | 0.081  | 25        | 1.75  | 1.06-2.43   | 0.001  | 73           | 5.1   | 3.93-6.27   | <0.001 |
|                     |        | Yes         | 718173 | 48       | 0.67 | 0.48-0.86 |        | 105       | 1.46  | 1.18-1.74   |        | 238       | 3.31  | 2.89-3.73   |        | 789          | 10.99 | 10.22-11.75 |        |
|                     | Female | No          | 146448 | 6        | 0.41 | 0.08-0.74 | 0.044  | 14        | 0.96  | 0.46-1.46   | 0.025  | 29        | 1.98  | 1.26-2.70   | <0.001 | 98           | 6.69  | 5.37-8.02   | <0.001 |
|                     |        | Yes         | 740384 | 71       | 0.96 | 0.74-1.18 |        | 132       | 1.78  | 1.48-2.09   |        | 296       | 4     | 3.54-4.45   |        | 1000         | 13.51 | 12.67-14.34 |        |
| Inner ear disease   | Male   | No          | 143128 | 13       | 0.91 | 0.41-1.40 | <0.001 | 20        | 1.4   | 0.78-2.01   | <0.001 | 48        | 3.35  | 2.41-4.30   | <0.001 | 147          | 10.27 | 8.61-11.93  | <0.001 |
|                     |        | Yes         | 718173 | 171      | 2.38 | 2.02-2.74 |        | 355       | 4.94  | 4.43-5.46   |        | 798       | 11.11 | 10.34-11.88 |        | 2219         | 30.9  | 29.61-32.18 |        |
|                     | Female | No          | 146448 | 30       | 2.05 | 1.32-2.78 | <0.001 | 51        | 3.48  | 2.53-4.44   | <0.001 | 104       | 7.1   | 5.74-8.47   | <0.001 | 319          | 21.78 | 19.39-24.17 | <0.001 |
|                     |        | Yes         | 740384 | 382      | 5.16 | 4.64-5.68 |        | 739       | 9.98  | 9.26-10.70  |        | 1583      | 21.38 | 20.33-22.43 |        | 4651         | 62.82 | 61.02-64.62 |        |
| Middle ear disease  | Male   | No          | 143128 | 5        | 0.35 | 0.04-0.66 | <0.001 | 15        | 1.05  | 0.52-1.58   | <0.001 | 39        | 2.72  | 1.87-3.58   | <0.001 | 126          | 8.8   | 7.27-10.34  | <0.001 |
|                     |        | Yes         | 718173 | 102      | 1.42 | 1.14-1.70 |        | 217       | 3.02  | 2.62-3.42   |        | 495       | 6.89  | 6.29-7.50   |        | 1495         | 20.82 | 19.76-21.87 |        |
|                     | Female | No          | 146448 | 9        | 0.61 | 0.21-1.02 | 0.004  | 27        | 1.84  | 1.15-2.54   | 0.002  | 54        | 3.69  | 2.70-4.67   | <0.001 | 164          | 11.2  | 9.49-12.91  | <0.001 |
|                     |        | Yes         | 740384 | 116      | 1.57 | 1.28-1.85 |        | 251       | 3.39  | 2.97-3.81   |        | 563       | 7.6   | 6.98-8.23   |        | 1848         | 24.96 | 23.82-26.10 |        |
| Other ear disease   | Male   | No          | 143128 | 19       | 1.33 | 0.73-1.92 | <0.001 | 32        | 2.24  | 1.46-3.01   | <0.001 | 84        | 5.87  | 4.61-7.12   | <0.001 | 267          | 18.65 | 16.42-20.89 | <0.001 |
|                     |        | Yes         | 718173 | 260      | 3.62 | 3.18-4.06 |        | 526       | 7.32  | 6.70-7.95   |        | 1134      | 15.79 | 14.87-16.71 |        | 3460         | 48.18 | 46.58-49.78 |        |
|                     | Female | No          | 146448 | 24       | 1.64 | 0.98-2.29 | <0.001 | 54        | 3.69  | 2.70-4.67   | <0.001 | 118       | 8.06  | 6.60-9.51   | <0.001 | 340          | 23.22 | 20.75-25.68 | <0.001 |
|                     |        | Yes         | 740384 | 290      | 3.92 | 3.47-4.37 |        | 586       | 7.91  | 7.27-8.56   |        | 1307      | 17.65 | 16.70-18.61 |        | 4092         | 55.27 | 53.58-56.96 |        |
| Periodontal disease | Male   | No          | 143128 | 0        | 0    | 0.00-0.00 | 0.037  | 0         | 0     | 0.00-0.00   | 0.003  | 5         | 0.35  | 0.04-0.66   | 0.01   | 11           | 0.77  | 0.31-1.22   | <0.001 |
|                     |        | Yes         | 718173 | 21       | 0.29 | 0.17-0.42 |        | 36        | 0.5   | 0.34-0.67   |        | 75        | 1.04  | 0.81-1.28   |        | 247          | 3.44  | 3.01-3.87   |        |
|                     | Female | No          | 146448 | 5        | 0.34 | 0.04-0.64 | 0.067  | 6         | 0.41  | 0.08-0.74   | 1      | 9         | 0.61  | 0.21-1.02   | 0.071  | 20           | 1.37  | 0.77-1.96   | <0.001 |
|                     |        | Yes         | 740384 | 9        | 0.12 | 0.04-0.20 |        | 34        | 0.46  | 0.30-0.61   |        | 85        | 1.15  | 0.90-1.39   |        | 241          | 3.26  | 2.84-3.67   |        |

**Supplement table S2. The cumulative incidence rates of non-fatal immune-related adverse events stratified by vaccine type**

| Disease             | Vaccination       | total  | One week |      |           |          | Two weeks |       |            |          | One month |       |             |          | Three months |       |             |          |
|---------------------|-------------------|--------|----------|------|-----------|----------|-----------|-------|------------|----------|-----------|-------|-------------|----------|--------------|-------|-------------|----------|
|                     |                   |        | event    | IR   | 95% CI    | <i>P</i> | event     | IR    | 95% CI     | <i>P</i> | event     | IR    | 95% CI      | <i>P</i> | event        | IR    | 95% CI      | <i>P</i> |
| Endometriosis       | No                | 289576 | 4        | 0.14 | 0.00-0.27 | 0.264    | 13        | 0.45  | 0.20-0.69  | 0.213    | 35        | 1.21  | 0.81-1.61   | 0.002    | 99           | 3.42  | 2.75-4.09   | <0.001   |
|                     | only mRNA vaccine | 849526 | 22       | 0.26 | 0.15-0.37 |          | 41        | 0.48  | 0.33-0.63  |          | 109       | 1.28  | 1.04-1.52   |          | 401          | 4.72  | 4.26-5.18   |          |
|                     | only cDNA vaccine | 510253 | 8        | 0.16 | 0.05-0.27 |          | 15        | 0.29  | 0.15-0.44  |          | 37        | 0.73  | 0.49-0.96   |          | 97           | 1.9   | 1.52-2.28   |          |
|                     | Cross             | 98778  | 4        | 0.4  | 0.01-0.80 |          | 7         | 0.71  | 0.18-1.23  |          | 19        | 1.92  | 1.06-2.79   |          | 86           | 8.71  | 6.87-10.55  |          |
| Menstrual disorder  | No                | 289576 | 82       | 2.83 | 2.22-3.44 | <0.001   | 161       | 5.56  | 4.70-6.42  | <0.001   | 346       | 11.95 | 10.69-13.21 | <0.001   | 1025         | 35.4  | 33.23-37.56 | <0.001   |
|                     | only mRNA vaccine | 849526 | 334      | 3.93 | 3.51-4.35 |          | 685       | 8.06  | 7.46-8.67  |          | 1533      | 18.05 | 17.14-18.95 |          | 4891         | 57.57 | 55.96-59.18 |          |
|                     | only cDNA vaccine | 510253 | 63       | 1.23 | 0.93-1.54 |          | 138       | 2.7   | 2.25-3.16  |          | 281       | 5.51  | 4.86-6.15   |          | 810          | 15.87 | 14.78-16.97 |          |
|                     | Cross             | 98778  | 45       | 4.56 | 3.22-5.89 |          | 112       | 11.34 | 9.24-13.44 |          | 267       | 27.03 | 23.79-30.27 |          | 780          | 78.96 | 73.45-84.48 |          |
| Bruise              | No                | 289576 | 4        | 0.14 | 0.00-0.27 | <0.001   | 6         | 0.21  | 0.04-0.37  | <0.001   | 11        | 0.38  | 0.16-0.60   | <0.001   | 48           | 1.66  | 1.19-2.13   | <0.001   |
|                     | only mRNA vaccine | 849526 | 56       | 0.66 | 0.49-0.83 |          | 86        | 1.01  | 0.80-1.23  |          | 142       | 1.67  | 1.40-1.95   |          | 296          | 3.48  | 3.09-3.88   |          |
|                     | only cDNA vaccine | 510253 | 47       | 0.92 | 0.66-1.18 |          | 87        | 1.71  | 1.35-2.06  |          | 131       | 2.57  | 2.13-3.01   |          | 231          | 4.53  | 3.94-5.11   |          |
|                     | Cross             | 98778  | 4        | 0.4  | 0.01-0.80 |          | 8         | 0.81  | 0.25-1.37  |          | 14        | 1.42  | 0.67-2.16   |          | 32           | 3.24  | 2.12-4.36   |          |
| Herpes zoster       | No                | 289576 | 31       | 1.07 | 0.69-1.45 | <0.001   | 66        | 2.28  | 1.73-2.83  | <0.001   | 162       | 5.59  | 4.73-6.46   | <0.001   | 454          | 15.68 | 14.24-17.12 | <0.001   |
|                     | only mRNA vaccine | 849526 | 237      | 2.79 | 2.43-3.14 |          | 535       | 6.3   | 5.76-6.83  |          | 1136      | 13.37 | 12.60-14.15 |          | 3365         | 39.61 | 38.27-40.95 |          |
|                     | only cDNA vaccine | 510253 | 215      | 4.21 | 3.65-4.78 |          | 463       | 9.07  | 8.25-9.90  |          | 987       | 19.34 | 18.14-20.55 |          | 2760         | 54.09 | 52.08-56.10 |          |
|                     | Cross             | 98778  | 20       | 2.02 | 1.14-2.91 |          | 57        | 5.77  | 4.27-7.27  |          | 147       | 14.88 | 12.48-17.29 |          | 450          | 45.56 | 41.36-49.76 |          |
| Alopecia            | No                | 289576 | 6        | 0.21 | 0.04-0.37 | 0.024    | 10        | 0.35  | 0.13-0.56  | 0.001    | 23        | 0.79  | 0.47-1.12   | <0.001   | 80           | 2.76  | 2.16-3.37   | <0.001   |
|                     | only mRNA vaccine | 849526 | 41       | 0.48 | 0.33-0.63 |          | 82        | 0.97  | 0.76-1.17  |          | 175       | 2.06  | 1.75-2.37   |          | 482          | 5.67  | 5.17-6.18   |          |
|                     | only cDNA vaccine | 510253 | 13       | 0.25 | 0.12-0.39 |          | 28        | 0.55  | 0.35-0.75  |          | 63        | 1.23  | 0.93-1.54   |          | 195          | 3.82  | 3.29-4.36   |          |
|                     | Cross             | 98778  | 7        | 0.71 | 0.18-1.23 |          | 12        | 1.21  | 0.53-1.90  |          | 28        | 2.83  | 1.78-3.88   |          | 89           | 9.01  | 7.14-10.88  |          |
| Warts               | No                | 289576 | 20       | 0.69 | 0.39-0.99 | 0.052    | 30        | 1.04  | 0.67-1.41  | <0.001   | 78        | 2.69  | 2.10-3.29   | <0.001   | 197          | 6.8   | 5.85-7.75   | <0.001   |
|                     | only mRNA vaccine | 849526 | 89       | 1.05 | 0.83-1.27 |          | 197       | 2.32  | 2.00-2.64  |          | 433       | 5.1   | 4.62-5.58   |          | 1157         | 13.62 | 12.84-14.40 |          |
|                     | only cDNA vaccine | 510253 | 34       | 0.67 | 0.44-0.89 |          | 79        | 1.55  | 1.21-1.89  |          | 173       | 3.39  | 2.89-3.90   |          | 504          | 9.88  | 9.02-10.74  |          |
|                     | Cross             | 98778  | 12       | 1.21 | 0.53-1.90 |          | 27        | 2.73  | 1.70-3.76  |          | 52        | 5.26  | 3.83-6.69   |          | 150          | 15.19 | 12.76-17.61 |          |
| Visual impairment   | No                | 289576 | 0        | 0    | 0.00-0.00 | 0.421    | 0         | 0     | 0.00-0.00  | 0.08     | 0         | 0     | 0.00-0.00   | 0.012    | 2            | 0.07  | 0.00-0.16   | <0.001   |
|                     | only mRNA vaccine | 849526 | 2        | 0.02 | 0.00-0.06 |          | 3         | 0.04  | 0.00-0.08  |          | 8         | 0.09  | 0.03-0.16   |          | 18           | 0.21  | 0.11-0.31   |          |
|                     | only cDNA vaccine | 510253 | 3        | 0.06 | 0.00-0.13 |          | 6         | 0.12  | 0.02-0.21  |          | 13        | 0.25  | 0.12-0.39   |          | 30           | 0.59  | 0.38-0.80   |          |
|                     | Cross             | 98778  | 0        | 0    | 0.00-0.00 |          | 0         | 0     | 0.00-0.00  |          | 2         | 0.2   | 0.00-0.48   |          | 2            | 0.2   | 0.00-0.48   |          |
| Glaucoma            | No                | 289576 | 43       | 1.48 | 1.04-1.93 | <0.001   | 80        | 2.76  | 2.16-3.37  | <0.001   | 199       | 6.87  | 5.92-7.83   | <0.001   | 534          | 18.44 | 16.88-20.00 | <0.001   |
|                     | only mRNA vaccine | 849526 | 218      | 2.57 | 2.23-2.91 |          | 449       | 5.29  | 4.80-5.77  |          | 966       | 11.37 | 10.65-12.09 |          | 3034         | 35.71 | 34.45-36.98 |          |
|                     | only cDNA vaccine | 510253 | 186      | 3.65 | 3.12-4.17 |          | 389       | 7.62  | 6.87-8.38  |          | 798       | 15.64 | 14.56-16.72 |          | 2367         | 46.39 | 44.52-48.25 |          |
|                     | Cross             | 98778  | 26       | 2.63 | 1.62-3.64 |          | 63        | 6.38  | 4.80-7.95  |          | 128       | 12.96 | 10.71-15.20 |          | 348          | 35.23 | 31.54-38.93 |          |
| Tinnitus            | No                | 289576 | 11       | 0.38 | 0.16-0.60 | 0.019    | 26        | 0.9   | 0.55-1.24  | 0.002    | 54        | 1.86  | 1.37-2.36   | <0.001   | 171          | 5.91  | 5.02-6.79   | <0.001   |
|                     | only mRNA vaccine | 849526 | 72       | 0.85 | 0.65-1.04 |          | 138       | 1.62  | 1.35-1.90  |          | 316       | 3.72  | 3.31-4.13   |          | 991          | 11.67 | 10.94-12.39 |          |
|                     | only cDNA vaccine | 510253 | 44       | 0.86 | 0.61-1.12 |          | 92        | 1.8   | 1.43-2.17  |          | 195       | 3.82  | 3.29-4.36   |          | 708          | 13.88 | 12.85-14.90 |          |
|                     | Cross             | 98778  | 3        | 0.3  | 0.00-0.65 |          | 7         | 0.71  | 0.18-1.23  |          | 23        | 2.33  | 1.38-3.28   |          | 90           | 9.11  | 7.23-10.99  |          |
| Inner ear disease   | No                | 289576 | 43       | 1.48 | 1.04-1.93 | <0.001   | 71        | 2.45  | 1.88-3.02  | <0.001   | 152       | 5.25  | 4.41-6.08   | <0.001   | 466          | 16.09 | 14.63-17.55 | <0.001   |
|                     | only mRNA vaccine | 849526 | 297      | 3.5  | 3.10-3.89 |          | 582       | 6.85  | 6.29-7.41  |          | 1285      | 15.13 | 14.30-15.95 |          | 3735         | 43.97 | 42.56-45.37 |          |
|                     | only cDNA vaccine | 510253 | 222      | 4.35 | 3.78-4.92 |          | 456       | 8.94  | 8.12-9.76  |          | 977       | 19.15 | 17.95-20.35 |          | 2793         | 54.74 | 52.71-56.76 |          |
|                     | Cross             | 98778  | 34       | 3.44 | 2.29-4.60 |          | 56        | 5.67  | 4.18-7.15  |          | 119       | 12.05 | 9.88-14.21  |          | 342          | 34.62 | 30.96-38.29 |          |
| Middle ear disease  | No                | 289576 | 14       | 0.48 | 0.23-0.74 | <0.001   | 42        | 1.45  | 1.01-1.89  | <0.001   | 93        | 3.21  | 2.56-3.86   | <0.001   | 290          | 10.01 | 8.86-11.17  | <0.001   |
|                     | only mRNA vaccine | 849526 | 125      | 1.47 | 1.21-1.73 |          | 284       | 3.34  | 2.95-3.73  |          | 623       | 7.33  | 6.76-7.91   |          | 1973         | 23.22 | 22.20-24.25 |          |
|                     | only cDNA vaccine | 510253 | 82       | 1.61 | 1.26-1.95 |          | 158       | 3.1   | 2.61-3.58  |          | 372       | 7.29  | 6.55-8.03   |          | 1157         | 22.68 | 21.37-23.98 |          |
|                     | Cross             | 98778  | 11       | 1.11 | 0.46-1.77 |          | 26        | 2.63  | 1.62-3.64  |          | 63        | 6.38  | 4.80-7.95   |          | 213          | 21.56 | 18.67-24.46 |          |
| Other ear disease   | No                | 289576 | 43       | 1.48 | 1.04-1.93 | <0.001   | 86        | 2.97  | 2.34-3.60  | <0.001   | 202       | 6.98  | 6.01-7.94   | <0.001   | 607          | 20.96 | 19.30-22.63 | <0.001   |
|                     | only mRNA vaccine | 849526 | 323      | 3.8  | 3.39-4.22 |          | 655       | 7.71  | 7.12-8.30  |          | 1448      | 17.04 | 16.17-17.92 |          | 4309         | 50.72 | 49.21-52.23 |          |
|                     | only cDNA vaccine | 510253 | 200      | 3.92 | 3.38-4.46 |          | 408       | 8     | 7.22-8.77  |          | 886       | 17.36 | 16.22-18.51 |          | 2881         | 56.46 | 54.41-58.52 |          |
|                     | Cross             | 98778  | 27       | 2.73 | 1.70-3.76 |          | 49        | 4.96  | 3.57-6.35  |          | 107       | 10.83 | 8.78-12.88  |          | 362          | 36.65 | 32.88-40.42 |          |
| Periodontal disease | No                | 289576 | 5        | 0.17 | 0.02-0.32 | 0.081    | 6         | 0.21  | 0.04-0.37  | <0.001   | 14        | 0.48  | 0.23-0.74   | <0.001   | 31           | 1.07  | 0.69-1.45   | <0.001   |
|                     | only mRNA vaccine | 849526 | 11       | 0.13 | 0.05-0.21 |          | 26        | 0.31  | 0.19-0.42  |          | 65        | 0.77  | 0.58-0.95   |          | 226          | 2.66  | 2.31-3.01   |          |
|                     | only cDNA vaccine | 510253 | 17       | 0.33 | 0.17-0.49 |          | 37        | 0.73  | 0.49-0.96  |          | 82        | 1.61  | 1.26-1.95   |          | 228          | 4.47  | 3.89-5.05   |          |
|                     | Cross             | 98778  | 2        | 0.2  | 0.00-0.48 |          | 7         | 0.71  | 0.18-1.23  |          | 13        | 1.32  | 0.60-2.03   |          | 34           | 3.44  | 2.29-4.60   |          |

**Supplement table S3. The Cox proportional hazards model of non-fatal immune-related adverse events following COVID-19 vaccination**

| Disease            | Variables       | Value  | HR    | 95% CI      | P           |        |
|--------------------|-----------------|--------|-------|-------------|-------------|--------|
| Endometriosis      | Vaccine         | Yes    | 1.629 | 1.312-2.022 | <0.001      |        |
|                    | Gender          | Female |       |             |             |        |
|                    | Age             |        |       | 0.971       | 0.966-0.976 | <0.001 |
|                    | Insurance Level | Low    |       |             |             |        |
|                    |                 | Middle |       | 0.988       | 0.801-1.220 | 0.913  |
|                    |                 | High   |       | 1.263       | 1.045-1.527 | 0.016  |
|                    | CCI             | 0      |       |             |             |        |
|                    |                 | 1      |       | 0.897       | 0.666-1.209 | 0.477  |
|                    |                 | 2≤     |       | 1.062       | 0.747-1.511 | 0.736  |
|                    | DM              |        |       | 0.693       | 0.444-1.080 | 0.105  |
|                    | HTN             |        |       | 0.599       | 0.436-0.824 | 0.002  |
|                    | HLD             |        |       | 0.973       | 0.744-1.271 | 0.838  |
|                    | COPD            |        |       | 0.894       | 0.500-1.602 | 0.707  |
| COVID19            |                 |        | 1.426 | 0.677-3.003 | 0.351       |        |
| Menstrual disorder | Vaccine         | Yes    | 2.022 | 1.892-2.162 | <0.001      |        |
|                    | Gender          | Female |       |             |             |        |
|                    | Age             |        |       | 0.945       | 0.943-0.946 | <0.001 |
|                    | Insurance Level | Low    |       |             |             |        |
|                    |                 | Middle |       | 1.077       | 1.014-1.144 | 0.016  |
|                    |                 | High   |       | 1.048       | 0.989-1.110 | 0.115  |
|                    | CCI             | 0      |       |             |             |        |
|                    |                 | 1      |       | 1.337       | 1.227-1.457 | <0.001 |
|                    |                 | 2≤     |       | 1.299       | 1.157-1.460 | <0.001 |
|                    | DM              |        |       | 0.825       | 0.713-0.953 | 0.009  |
|                    | HTN             |        |       | 0.694       | 0.620-0.778 | <0.001 |
|                    | HLD             |        |       | 0.852       | 0.774-0.937 | 0.001  |
|                    | COPD            |        |       | 1.024       | 0.872-1.203 | 0.774  |
| COVID19            |                 |        | 1.305 | 1.036-1.643 | 0.024       |        |
| Bruise             | Vaccine         | Yes    | 1.805 | 1.337-2.436 | <0.001      |        |
|                    | Gender          | Female | 1.527 | 1.295-1.800 | <0.001      |        |
|                    | Age             |        |       | 1.011       | 1.005-1.017 | <0.001 |
|                    | Insurance Level | Low    |       |             |             |        |
|                    |                 | Middle |       | 0.927       | 0.740-1.163 | 0.513  |
|                    |                 | High   |       | 1.089       | 0.898-1.321 | 0.387  |
|                    | CCI             | 0      |       |             |             |        |
|                    |                 | 1      |       | 1.25        | 0.974-1.603 | 0.079  |
|                    |                 | 2≤     |       | 2.094       | 1.626-2.697 | <0.001 |
|                    | DM              |        |       | 0.765       | 0.597-0.980 | 0.034  |
|                    | HTN             |        |       | 1.08        | 0.878-1.328 | 0.466  |
|                    | HLD             |        |       | 1.203       | 0.975-1.485 | 0.085  |
|                    | COPD            |        |       | 0.797       | 0.538-1.182 | 0.259  |
| COVID19            |                 |        | 1.032 | 0.428-2.489 | 0.944       |        |
| Herpes zoster      | Vaccine         | Yes    | 2.337 | 2.122-2.573 | <0.001      |        |
|                    | Gender          | Female | 1.417 | 1.350-1.486 | <0.001      |        |
|                    | Age             |        |       | 1.018       | 1.016-1.019 | <0.001 |
|                    | Insurance Level | Low    |       |             |             |        |
|                    |                 | Middle |       | 1.025       | 0.960-1.094 | 0.455  |
|                    |                 | High   |       | 1.047       | 0.989-1.109 | 0.115  |
|                    | CCI             | 0      |       |             |             |        |
| 1                  |                 |        | 1.06  | 0.985-1.140 | 0.119       |        |

|                   |                 |         |         |              |             |        |
|-------------------|-----------------|---------|---------|--------------|-------------|--------|
|                   |                 | 2≤      | 1.101   | 1.013-1.196  | 0.024       |        |
|                   |                 | DM      | 0.899   | 0.831-0.973  | 0.008       |        |
|                   |                 | HTN     | 0.898   | 0.845-0.955  | 0.001       |        |
|                   |                 | HLD     | 1.242   | 1.168-1.321  | <0.001      |        |
|                   |                 | COPD    | 1.09    | 0.971-1.224  | 0.142       |        |
|                   |                 | COVID19 | 1.236   | 0.969-1.575  | 0.087       |        |
| Alopecia          | Vaccine         | Yes     | 2.397   | 1.896-3.029  | <0.001      |        |
|                   | Gender          | Female  | 1.013   | 0.884-1.160  | 0.854       |        |
|                   |                 | Age     | 0.977   | 0.972-0.982  | <0.001      |        |
|                   | Insurance Level |         | Low     |              |             |        |
|                   |                 |         | Middle  | 0.849        | 0.705-1.023 | 0.086  |
|                   |                 |         | High    | 0.958        | 0.813-1.130 | 0.613  |
|                   | CCI             |         | 0       |              |             |        |
|                   |                 |         | 1       | 1.248        | 0.993-1.569 | 0.058  |
|                   |                 |         | 2≤      | 0.862        | 0.631-1.177 | 0.35   |
|                   |                 |         | DM      | 0.763        | 0.564-1.031 | 0.078  |
|                   |                 |         | HTN     | 0.704        | 0.563-0.879 | 0.002  |
|                   |                 |         | HLD     | 1.302        | 1.056-1.606 | 0.014  |
|                   |                 |         | COPD    | 0.992        | 0.638-1.541 | 0.97   |
|                   |                 |         | COVID19 | 0.937        | 0.420-2.092 | 0.874  |
| Warts             | Vaccine         | Yes     | 2.279   | 1.963-2.647  | <0.001      |        |
|                   | Gender          | Female  | 0.843   | 0.772-0.921  | <0.001      |        |
|                   |                 | Age     | 0.968   | 0.965-0.971  | <0.001      |        |
|                   | Insurance Level |         | Low     |              |             |        |
|                   |                 |         | Middle  | 1.021        | 0.901-1.158 | 0.744  |
|                   |                 |         | High    | 1.217        | 1.089-1.362 | 0.001  |
|                   | CCI             |         | 0       |              |             |        |
|                   |                 |         | 1       | 1.27         | 1.095-1.473 | 0.002  |
|                   |                 |         | 2≤      | 1.231        | 1.023-1.482 | 0.028  |
|                   |                 |         | DM      | 0.704        | 0.584-0.847 | <0.001 |
|                   |                 |         | HTN     | 1.039        | 0.904-1.193 | 0.594  |
|                   |                 |         | HLD     | 1.352        | 1.180-1.550 | <0.001 |
|                   |                 |         | COPD    | 1.069        | 0.820-1.394 | 0.62   |
|                   |                 |         | COVID19 | 1.087        | 0.674-1.752 | 0.733  |
| Visual impairment | Vaccine         | Yes     | 3.935   | 0.943-16.410 | 0.06        |        |
|                   | Gender          | Female  | 0.639   | 0.366-1.117  | 0.116       |        |
|                   |                 | Age     | 1.016   | 0.995-1.037  | 0.133       |        |
|                   | Insurance Level |         | Low     |              |             |        |
|                   |                 |         | Middle  | 0.913        | 0.439-1.896 | 0.807  |
|                   |                 |         | High    | 0.811        | 0.422-1.556 | 0.528  |
|                   | CCI             |         | 0       |              |             |        |
|                   |                 |         | 1       | 0.792        | 0.323-1.942 | 0.61   |
|                   |                 |         | 2≤      | 1.325        | 0.532-3.300 | 0.546  |
|                   |                 |         | DM      | 0.735        | 0.300-1.802 | 0.501  |
|                   |                 |         | HTN     | 1.112        | 0.555-2.230 | 0.765  |
|                   |                 |         | HLD     | 1.399        | 0.686-2.854 | 0.355  |
|                   |                 |         | COPD    | 1.185        | 0.343-4.094 | 0.789  |
|                   |                 |         | COVID19 |              |             |        |
|                   | Vaccine         | Yes     | 1.715   | 1.567-1.878  | <0.001      |        |
|                   | Gender          | Female  | 1.224   | 1.164-1.287  | <0.001      |        |
|                   |                 | Age     | 1.013   | 1.011-1.015  | <0.001      |        |
|                   | Insurance Level |         | Low     |              |             |        |
|                   |                 |         | Middle  | 0.927        | 0.862-0.997 | 0.041  |

|                    |                 |        |             |             |        |
|--------------------|-----------------|--------|-------------|-------------|--------|
| Glaucoma           |                 | High   | 1.244       | 1.170-1.322 | <0.001 |
|                    | CCI             | 0      |             |             |        |
|                    |                 | 1      | 1.132       | 1.048-1.222 | 0.002  |
|                    |                 | 2≤     | 1.172       | 1.073-1.279 | <0.001 |
|                    | DM              |        | 0.923       | 0.850-1.003 | 0.058  |
|                    | HTN             |        | 0.979       | 0.917-1.045 | 0.518  |
|                    | HLD             |        | 1.258       | 1.177-1.344 | <0.001 |
|                    | COPD            |        | 1.059       | 0.937-1.197 | 0.358  |
|                    | COVID19         |        | 1.234       | 0.957-1.591 | 0.106  |
| Tinnitus           | Vaccine         | Yes    | 1.778       | 1.515-2.087 | <0.001 |
|                    | Gender          | Female | 1.218       | 1.114-1.333 | <0.001 |
|                    | Age             |        | 1.009       | 1.005-1.012 | <0.001 |
|                    | Insurance Level | Low    |             |             |        |
|                    |                 | Middle | 1.039       | 0.920-1.174 | 0.535  |
|                    |                 | High   | 1.011       | 0.906-1.127 | 0.85   |
|                    | CCI             | 0      |             |             |        |
|                    |                 | 1      | 1.139       | 0.992-1.309 | 0.066  |
|                    |                 | 2≤     | 1.174       | 1.000-1.377 | 0.049  |
|                    | DM              |        | 0.886       | 0.762-1.031 | 0.118  |
|                    | HTN             |        | 0.921       | 0.818-1.038 | 0.177  |
|                    | HLD             |        | 1.315       | 1.167-1.483 | <0.001 |
|                    | COPD            |        | 1.045       | 0.834-1.310 | 0.703  |
| COVID19            |                 | 1.119  | 0.694-1.804 | 0.646       |        |
| Inner ear disease  | Vaccine         | Yes    | 2.368       | 2.153-2.604 | <0.001 |
|                    | Gender          | Female | 1.998       | 1.902-2.099 | <0.001 |
|                    | Age             |        | 1.015       | 1.013-1.017 | <0.001 |
|                    | Insurance Level | Low    |             |             |        |
|                    |                 | Middle | 1.033       | 0.970-1.101 | 0.312  |
|                    |                 | High   | 1.051       | 0.994-1.112 | 0.082  |
|                    | CCI             | 0      |             |             |        |
|                    |                 | 1      | 1.151       | 1.074-1.234 | <0.001 |
|                    |                 | 2≤     | 1.174       | 1.084-1.272 | <0.001 |
|                    | DM              |        | 0.771       | 0.713-0.832 | <0.001 |
|                    | HTN             |        | 0.974       | 0.918-1.035 | 0.398  |
|                    | HLD             |        | 1.295       | 1.220-1.375 | <0.001 |
|                    | COPD            |        | 1.253       | 1.127-1.392 | <0.001 |
| COVID19            |                 | 1.283  | 1.017-1.618 | 0.036       |        |
| Middle ear disease | Vaccine         | Yes    | 2.212       | 1.958-2.500 | <0.001 |
|                    | Gender          | Female | 1.208       | 1.131-1.290 | <0.001 |
|                    | Age             |        | 0.996       | 0.994-0.998 | 0.001  |
|                    | Insurance Level | Low    |             |             |        |
|                    |                 | Middle | 1.039       | 0.950-1.136 | 0.404  |
|                    |                 | High   | 1.023       | 0.944-1.109 | 0.581  |
|                    | CCI             | 0      |             |             |        |
|                    |                 | 1      | 1.25        | 1.127-1.386 | <0.001 |
|                    |                 | 2≤     | 1.488       | 1.323-1.674 | <0.001 |
|                    | DM              |        | 0.875       | 0.781-0.982 | 0.023  |
|                    | HTN             |        | 0.981       | 0.896-1.075 | 0.686  |
|                    | HLD             |        | 1.112       | 1.015-1.219 | 0.023  |
|                    | COPD            |        | 1.237       | 1.057-1.447 | 0.008  |
| COVID19            |                 | 1.219  | 0.874-1.701 | 0.243       |        |
| Vaccine            | Yes             | 1.9    | 1.746-2.066 | <0.001      |        |
| Gender             | Female          | 1.132  | 1.084-1.183 | <0.001      |        |

|                     |                 |        |             |             |        |
|---------------------|-----------------|--------|-------------|-------------|--------|
| Other ear disease   | Age             |        | 1.02        | 1.019-1.022 | <0.001 |
|                     | Insurance Level | Low    |             |             |        |
|                     |                 | Middle | 0.972       | 0.914-1.032 | 0.353  |
|                     |                 | High   | 1.029       | 0.976-1.085 | 0.291  |
|                     | CCI             | 0      |             |             |        |
|                     |                 | 1      | 1.121       | 1.049-1.198 | 0.001  |
|                     |                 | 2≤     | 1.199       | 1.112-1.294 | <0.001 |
|                     | DM              |        | 0.917       | 0.855-0.984 | 0.016  |
|                     | HTN             |        | 0.994       | 0.940-1.051 | 0.836  |
|                     | HLD             |        | 1.192       | 1.126-1.262 | <0.001 |
|                     | COPD            |        | 1.26        | 1.144-1.389 | <0.001 |
|                     | COVID19         |        | 1.218       | 0.975-1.523 | 0.083  |
| Periodontal disease | Vaccine         | Yes    | 2.084       | 1.443-3.009 | <0.001 |
|                     | Gender          | Female | 0.958       | 0.806-1.140 | 0.63   |
|                     | Age             |        | 1.032       | 1.025-1.039 | <0.001 |
|                     | Insurance Level | Low    |             |             |        |
|                     |                 | Middle | 0.81        | 0.642-1.022 | 0.076  |
|                     |                 | High   | 0.767       | 0.627-0.937 | 0.009  |
|                     | CCI             | 0      |             |             |        |
|                     |                 | 1      | 1.372       | 1.058-1.779 | 0.017  |
|                     |                 | 2≤     | 1.51        | 1.130-2.016 | 0.005  |
|                     | DM              |        | 1.218       | 0.950-1.562 | 0.12   |
|                     | HTN             |        | 1.06        | 0.857-1.311 | 0.589  |
|                     | HLD             |        | 1.089       | 0.874-1.358 | 0.447  |
| COPD                |                 | 1.339  | 0.961-1.867 | 0.084       |        |
| COVID19             |                 | 1.861  | 0.925-3.746 | 0.082       |        |

**Supplement table S4. Multivariate logistic regression model of non-fatal immune-related adverse events following COVID-19 vaccination**

| Disease            | Variable        | Value  | One week    |              |             | Two weeks    |              |             | One month   |             |             | Three months |             |             |        |
|--------------------|-----------------|--------|-------------|--------------|-------------|--------------|--------------|-------------|-------------|-------------|-------------|--------------|-------------|-------------|--------|
|                    |                 |        | OR          | 95% CI       | <i>P</i>    | OR           | 95% CI       | <i>P</i>    | OR          | 95% CI      | <i>P</i>    | OR           | 95% CI      | <i>P</i>    |        |
| Endometriosis      | Vaccine         | Yes    | 2.381       | 0.835-6.795  | 0.105       | 1.344        | 0.732-2.467  | 0.341       | 1.261       | 0.869-1.830 | 0.222       | 1.631        | 1.313-2.025 | <0.001      |        |
|                    | Gender          | Female |             |              |             |              |              |             |             |             |             |              |             |             |        |
|                    | Age             |        | 0.976       | 0.954-0.998  | 0.034       | 0.979        | 0.963-0.995  | 0.009       | 0.973       | 0.964-0.983 | <0.001      | 0.971        | 0.966-0.976 | <0.001      |        |
|                    | Insurance Level | Low    |             |              |             |              |              |             |             |             |             |              |             |             |        |
|                    |                 | Middle |             | 0.803        | 0.334-1.935 | 0.626        | 1.091        | 0.546-2.179 | 0.806       | 1.151       | 0.771-1.719 | 0.492        | 0.988       | 0.801-1.220 | 0.914  |
|                    |                 | High   |             | 1.066        | 0.492-2.310 | 0.871        | 1.842        | 1.007-3.368 | 0.047       | 1.497       | 1.041-2.152 | 0.03         | 1.263       | 1.045-1.527 | 0.016  |
|                    | CCI             | 0      |             |              |             |              |              |             |             |             |             |              |             |             |        |
|                    |                 | 1      |             | 0.422        | 0.083-2.153 | 0.3          | 0.535        | 0.176-1.625 | 0.27        | 0.815       | 0.465-1.429 | 0.475        | 0.897       | 0.666-1.209 | 0.476  |
|                    |                 | 2≤     |             | 0.292        | 0.030-2.801 | 0.286        | 0.285        | 0.056-1.454 | 0.131       | 0.696       | 0.339-1.430 | 0.324        | 1.061       | 0.746-1.508 | 0.743  |
|                    | DM              |        | 0.766       | 0.066-8.920  | 0.831       | 1.449        | 0.307-6.846  | 0.639       | 0.974       | 0.446-2.128 | 0.948       | 0.693        | 0.444-1.080 | 0.105       |        |
|                    | HTN             |        | 0.561       | 0.144-2.188  | 0.406       | 0.358        | 0.116-1.104  | 0.074       | 0.692       | 0.397-1.208 | 0.196       | 0.599        | 0.436-0.823 | 0.002       |        |
|                    | HLD             |        | 1.335       | 0.460-3.872  | 0.595       | 1.047        | 0.462-2.374  | 0.912       | 1.059       | 0.652-1.720 | 0.816       | 0.973        | 0.745-1.271 | 0.842       |        |
|                    | COPD            |        | 0           | 0.000-.00    | 0.979       | 0            | 0.000-.00    | 0.98        | 0.792       | 0.238-2.633 | 0.703       | 0.894        | 0.499-1.601 | 0.706       |        |
| COVID19            |                 | 0      | 0.000-.00   | 0.988        | 1.955       | 0.272-14.067 | 0.506        | 1.401       | 0.348-5.644 | 0.636       | 1.425       | 0.676-3.003  | 0.352       |             |        |
| Menstrual disorder | Vaccine         | Yes    | 1.68        | 1.323-2.134  | <0.001      | 1.821        | 1.537-2.157  | <0.001      | 1.901       | 1.694-2.133 | <0.001      | 2.037        | 1.905-2.178 | <0.001      |        |
|                    | Gender          | Female |             |              |             |              |              |             |             |             |             |              |             |             |        |
|                    | Age             |        | 0.944       | 0.937-0.950  | <0.001      | 0.945        | 0.940-0.949  | <0.001      | 0.946       | 0.943-0.949 | <0.001      | 0.944        | 0.943-0.946 | <0.001      |        |
|                    | Insurance Level | Low    |             |              |             |              |              |             |             |             |             |              |             |             |        |
|                    |                 | Middle |             | 1.015        | 0.813-1.267 | 0.898        | 1.018        | 0.869-1.192 | 0.824       | 1.077       | 0.969-1.197 | 0.168        | 1.077       | 1.014-1.145 | 0.016  |
|                    |                 | High   |             | 0.914        | 0.736-1.136 | 0.419        | 1.039        | 0.894-1.208 | 0.616       | 1.029       | 0.929-1.139 | 0.586        | 1.049       | 0.990-1.112 | 0.108  |
|                    | CCI             | 0      |             |              |             |              |              |             |             |             |             |              |             |             |        |
|                    |                 | 1      |             | 1.557        | 1.143-2.120 | 0.005        | 1.365        | 1.094-1.704 | 0.006       | 1.331       | 1.145-1.547 | <0.001       | 1.342       | 1.230-1.463 | <0.001 |
|                    |                 | 2≤     |             | 1.416        | 0.929-2.158 | 0.106        | 1.342        | 0.999-1.803 | 0.051       | 1.217       | 0.991-1.496 | 0.061        | 1.301       | 1.158-1.463 | <0.001 |
|                    | DM              |        | 1.063       | 0.658-1.716  | 0.803       | 0.841        | 0.589-1.203  | 0.343       | 0.884       | 0.692-1.130 | 0.324       | 0.823        | 0.712-0.952 | 0.009       |        |
|                    | HTN             |        | 0.644       | 0.426-0.974  | 0.037       | 0.647        | 0.484-0.866  | 0.003       | 0.726       | 0.599-0.881 | 0.001       | 0.696        | 0.621-0.780 | <0.001      |        |
|                    | HLD             |        | 0.997       | 0.706-1.407  | 0.985       | 1.028        | 0.811-1.303  | 0.822       | 0.904       | 0.767-1.066 | 0.231       | 0.852        | 0.774-0.938 | 0.001       |        |
|                    | COPD            |        | 0.948       | 0.525-1.714  | 0.86        | 0.946        | 0.617-1.449  | 0.799       | 1.031       | 0.777-1.368 | 0.833       | 1.025        | 0.871-1.206 | 0.767       |        |
| COVID19            |                 | 1.25   | 0.517-3.018 | 0.62         | 1.708       | 1.007-2.897  | 0.047        | 1.491       | 1.019-2.183 | 0.04        | 1.309       | 1.036-1.652  | 0.024       |             |        |
| Bruise             | Vaccine         | Yes    | 4.521       | 1.649-12.397 | 0.003       | 4.687        | 2.064-10.643 | <0.001      | 4.091       | 2.228-7.513 | <0.001      | 1.814        | 1.344-2.449 | <0.001      |        |
|                    | Gender          | Female | 1.515       | 1.030-2.228  | 0.035       | 1.734        | 1.282-2.344  | <0.001      | 1.624       | 1.282-2.058 | <0.001      | 1.527        | 1.296-1.800 | <0.001      |        |
|                    | Age             |        | 0.995       | 0.981-1.009  | 0.455       | 0.999        | 0.988-1.010  | 0.887       | 1.004       | 0.995-1.012 | 0.42        | 1.011        | 1.005-1.017 | <0.001      |        |
|                    | Insurance Level | Low    |             |              |             |              |              |             |             |             |             |              |             |             |        |
|                    |                 | Middle |             | 0.822        | 0.490-1.380 | 0.459        | 0.788        | 0.524-1.185 | 0.253       | 0.971       | 0.705-1.337 | 0.855        | 0.927       | 0.740-1.163 | 0.513  |
|                    |                 | High   |             | 0.935        | 0.600-1.458 | 0.767        | 0.994        | 0.708-1.397 | 0.973       | 1.076       | 0.815-1.420 | 0.606        | 1.089       | 0.898-1.321 | 0.386  |
|                    | CCI             | 0      |             |              |             |              |              |             |             |             |             |              |             |             |        |
|                    |                 | 1      |             | 1.118        | 0.629-1.988 | 0.704        | 1.467        | 0.957-2.247 | 0.078       | 1.556       | 1.107-2.187 | 0.011        | 1.25        | 0.974-1.603 | 0.079  |
|                    |                 | 2≤     |             | 1.176        | 0.612-2.259 | 0.627        | 1.935        | 1.226-3.055 | 0.005       | 2.319       | 1.623-3.313 | <0.001       | 2.091       | 1.623-2.693 | <0.001 |
|                    | DM              |        | 0.826       | 0.449-1.517  | 0.537       | 0.683        | 0.442-1.056  | 0.086       | 0.71        | 0.504-1.001 | 0.051       | 0.765        | 0.597-0.980 | 0.034       |        |
|                    | HTN             |        | 0.834       | 0.513-1.356  | 0.465       | 1.025        | 0.710-1.479  | 0.895       | 0.955       | 0.714-1.279 | 0.759       | 1.08         | 0.878-1.328 | 0.467       |        |
|                    | HLD             |        | 2.496       | 1.523-4.091  | <0.001      | 1.976        | 1.355-2.882  | <0.001      | 1.558       | 1.156-2.099 | 0.004       | 1.204        | 0.976-1.486 | 0.083       |        |
|                    | COPD            |        | 0.824       | 0.291-2.329  | 0.715       | 0.558        | 0.242-1.286  | 0.171       | 0.668       | 0.368-1.211 | 0.183       | 0.796        | 0.537-1.180 | 0.256       |        |
| COVID19            |                 | 1.179  | 0.164-8.453 | 0.87         | 1.39        | 0.345-5.602  | 0.644        | 1.286       | 0.412-4.013 | 0.665       | 1.03        | 0.427-2.485  | 0.948       |             |        |
| Vaccine            | Yes             | 2.558  | 1.770-3.698 | <0.001       | 2.635       | 2.048-3.391  | <0.001       | 2.281       | 1.940-2.681 | <0.001      | 2.354       | 2.137-2.592  | <0.001      |             |        |
| Gender             | Female          | 1.489  | 1.243-1.783 | <0.001       | 1.51        | 1.338-1.705  | <0.001       | 1.443       | 1.330-1.566 | <0.001      | 1.418       | 1.352-1.488  | <0.001      |             |        |





|                    |                 |         |             |              |             |             |              |             |             |             |             |             |             |             |
|--------------------|-----------------|---------|-------------|--------------|-------------|-------------|--------------|-------------|-------------|-------------|-------------|-------------|-------------|-------------|
| visual impairments | CCI             | 1       | 1.36        | 0.070-26.532 | 0.839       | 1.73        | 0.224-13.341 | 0.599       | 0.729       | 0.181-2.933 | 0.656       | 0.791       | 0.323-1.941 | 0.609       |
|                    |                 | 2≤      | 3.018       | 0.182-50.059 | 0.441       | 1.497       | 0.152-14.756 | 0.73        | 2.147       | 0.631-7.314 | 0.222       | 1.323       | 0.531-3.295 | 0.548       |
|                    | DM              |         | 0.653       | 0.085-5.032  | 0.682       | 1.068       | 0.216-5.268  | 0.936       | 0.554       | 0.166-1.851 | 0.338       | 0.735       | 0.300-1.802 | 0.501       |
|                    | HTN             |         | 2.217       | 0.196-25.122 | 0.52        | 2.337       | 0.396-13.787 | 0.349       | 1.409       | 0.516-3.848 | 0.503       | 1.112       | 0.554-2.230 | 0.765       |
|                    | HLD             |         | 2.536       | 0.219-29.324 | 0.456       | 2.313       | 0.382-14.007 | 0.362       | 1.047       | 0.379-2.892 | 0.93        | 1.401       | 0.687-2.856 | 0.354       |
|                    | COPD            |         | 1.977       | 0.194-20.169 | 0.565       | 3.213       | 0.568-18.180 | 0.187       | 1.964       | 0.520-7.415 | 0.32        | 1.183       | 0.342-4.088 | 0.791       |
|                    | COVID19         |         | 0           | 0.000-.00    | 0.99        | 0           | 0.000-.00    | 0.991       | 0           | 0.000-.00   | 0.989       | 0           | 0.000-.00   | 0.983       |
|                    | Glaucoma        | Vaccine | Yes         | 1.581        | 1.148-2.178 | 0.005       | 1.788        | 1.416-2.256 | <0.001      | 1.501       | 1.292-1.742 | <0.001      | 1.725       | 1.576-1.889 |
| Gender             |                 | Female  | 1.217       | 1.013-1.461  | 0.036       | 1.286       | 1.133-1.461  | <0.001      | 1.207       | 1.106-1.316 | <0.001      | 1.225       | 1.164-1.288 | <0.001      |
| Age                |                 | 1.015   | 1.008-1.021 | <0.001       | 1.015       | 1.010-1.019 | <0.001       | 1.014       | 1.011-1.017 | <0.001      | 1.013       | 1.011-1.015 | <0.001      |             |
| Insurance Level    |                 | Low     |             |              |             |             |              |             |             |             |             |             |             |             |
|                    |                 | Middle  | 0.994       | 0.755-1.309  | 0.968       | 0.987       | 0.820-1.189  | 0.894       | 0.958       | 0.846-1.085 | 0.503       | 0.927       | 0.862-0.997 | 0.041       |
|                    |                 | High    | 1.478       | 1.175-1.859  | 0.001       | 1.318       | 1.127-1.541  | 0.001       | 1.203       | 1.083-1.338 | 0.001       | 1.245       | 1.171-1.323 | <0.001      |
| CCI                |                 | 0       |             |              |             |             |              |             |             |             |             |             |             |             |
|                    |                 | 1       | 1.11        | 0.841-1.466  | 0.461       | 1.114       | 0.918-1.353  | 0.274       | 1.114       | 0.975-1.274 | 0.113       | 1.132       | 1.048-1.223 | 0.002       |
|                    |                 | 2≤      | 1.026       | 0.741-1.420  | 0.879       | 1.044       | 0.832-1.310  | 0.708       | 1.076       | 0.922-1.257 | 0.352       | 1.17        | 1.071-1.277 | 0.001       |
| DM                 |                 | 0.803   | 0.589-1.093 | 0.163        | 0.957       | 0.775-1.181 | 0.68         | 0.975       | 0.845-1.124 | 0.723       | 0.923       | 0.850-1.003 | 0.059       |             |
| HTN                |                 | 0.997   | 0.786-1.265 | 0.981        | 0.996       | 0.845-1.174 | 0.963        | 0.928       | 0.829-1.039 | 0.194       | 0.978       | 0.917-1.044 | 0.513       |             |
| HLD                |                 | 1.323   | 1.042-1.681 | 0.022        | 1.225       | 1.037-1.448 | 0.017        | 1.348       | 1.202-1.512 | <0.001      | 1.26        | 1.179-1.346 | <0.001      |             |
| COPD               |                 | 1.026   | 0.646-1.629 | 0.915        | 1.099       | 0.805-1.498 | 0.553        | 1.133       | 0.919-1.397 | 0.241       | 1.057       | 0.935-1.196 | 0.376       |             |
| COVID19            |                 | 2.237   | 1.111-4.504 | 0.024        | 1.463       | 0.807-2.652 | 0.21         | 1.039       | 0.644-1.676 | 0.875       | 1.232       | 0.955-1.590 | 0.109       |             |
| Tinnitus           | Vaccine         | Yes     | 1.84        | 0.981-3.451  | 0.058       | 1.513       | 1.000-2.287  | 0.05        | 1.688       | 1.269-2.247 | <0.001      | 1.787       | 1.523-2.098 | <0.001      |
|                    | Gender          | Female  | 1.376       | 0.968-1.957  | 0.075       | 1.191       | 0.932-1.521  | 0.162       | 1.18        | 1.002-1.389 | 0.048       | 1.219       | 1.114-1.333 | <0.001      |
|                    | Age             |         | 1.013       | 1.001-1.026  | 0.039       | 1.014       | 1.005-1.023  | 0.002       | 1.011       | 1.005-1.017 | <0.001      | 1.009       | 1.005-1.012 | <0.001      |
|                    | Insurance Level | Low     |             |              |             |             |              |             |             |             |             |             |             |             |
|                    |                 | Middle  | 1.175       | 0.740-1.866  | 0.495       | 1.137       | 0.821-1.574  | 0.44        | 1.107       | 0.888-1.379 | 0.367       | 1.039       | 0.920-1.174 | 0.535       |
|                    |                 | High    | 0.958       | 0.624-1.473  | 0.846       | 0.952       | 0.705-1.285  | 0.748       | 0.982       | 0.803-1.200 | 0.856       | 1.011       | 0.906-1.127 | 0.848       |
|                    | CCI             | 0       |             |              |             |             |              |             |             |             |             |             |             |             |
|                    |                 | 1       | 1.095       | 0.640-1.874  | 0.741       | 1.218       | 0.840-1.767  | 0.297       | 1.096       | 0.849-1.415 | 0.482       | 1.139       | 0.991-1.309 | 0.066       |
|                    |                 | 2≤      | 1.19        | 0.647-2.190  | 0.576       | 1.318       | 0.863-2.013  | 0.202       | 1.308       | 0.985-1.738 | 0.064       | 1.171       | 0.998-1.374 | 0.053       |
|                    | DM              |         | 0.77        | 0.422-1.404  | 0.393       | 0.794       | 0.528-1.196  | 0.27        | 0.793       | 0.600-1.048 | 0.102       | 0.886       | 0.762-1.032 | 0.119       |
|                    | HTN             |         | 0.991       | 0.626-1.569  | 0.971       | 1.064       | 0.772-1.465  | 0.705       | 1.014       | 0.817-1.259 | 0.901       | 0.921       | 0.818-1.037 | 0.175       |
|                    | HLD             |         | 1.19        | 0.750-1.888  | 0.461       | 1.071       | 0.774-1.483  | 0.679       | 1.171       | 0.941-1.458 | 0.157       | 1.317       | 1.168-1.485 | <0.001      |
| COPD               |                 | 0.871   | 0.341-2.224 | 0.773        | 1.138       | 0.643-2.016 | 0.657        | 0.981       | 0.648-1.485 | 0.929       | 1.043       | 0.832-1.307 | 0.715       |             |
| COVID19            |                 | 1.009   | 0.141-7.223 | 0.993        | 1.447       | 0.463-4.520 | 0.525        | 1.092       | 0.452-2.635 | 0.845       | 1.116       | 0.692-1.801 | 0.652       |             |
| Inner ear disease  | Vaccine         | Yes     | 2.216       | 1.617-3.037  | <0.001      | 2.557       | 2.005-3.261  | <0.001      | 2.563       | 2.170-3.026 | <0.001      | 2.386       | 2.169-2.624 | <0.001      |
|                    | Gender          | Female  | 2.137       | 1.794-2.545  | <0.001      | 2.014       | 1.779-2.279  | <0.001      | 1.906       | 1.754-2.072 | <0.001      | 2.002       | 1.906-2.104 | <0.001      |
|                    | Age             |         | 1.01        | 1.004-1.016  | 0.001       | 1.013       | 1.009-1.017  | <0.001      | 1.014       | 1.011-1.017 | <0.001      | 1.015       | 1.013-1.017 | <0.001      |
|                    | Insurance Level | Low     |             |              |             |             |              |             |             |             |             |             |             |             |
|                    |                 | Middle  | 1.139       | 0.916-1.415  | 0.242       | 1.109       | 0.945-1.302  | 0.205       | 1.042       | 0.934-1.162 | 0.462       | 1.033       | 0.970-1.101 | 0.312       |
|                    |                 | High    | 0.985       | 0.807-1.203  | 0.881       | 1.107       | 0.959-1.277  | 0.164       | 1.101       | 1.000-1.212 | 0.05        | 1.051       | 0.994-1.112 | 0.082       |
|                    | CCI             | 0       |             |              |             |             |              |             |             |             |             |             |             |             |
|                    |                 | 1       | 1.05        | 0.819-1.346  | 0.7         | 1.074       | 0.901-1.281  | 0.427       | 1.091       | 0.968-1.230 | 0.152       | 1.152       | 1.074-1.235 | <0.001      |
|                    |                 | 2≤      | 0.934       | 0.692-1.260  | 0.656       | 0.99        | 0.803-1.220  | 0.924       | 1.054       | 0.916-1.212 | 0.463       | 1.173       | 1.082-1.271 | <0.001      |
|                    | DM              |         | 0.742       | 0.555-0.992  | 0.044       | 0.771       | 0.630-0.942  | 0.011       | 0.835       | 0.731-0.954 | 0.008       | 0.77        | 0.712-0.832 | <0.001      |
|                    | HTN             |         | 1.095       | 0.882-1.358  | 0.411       | 1.04        | 0.893-1.211  | 0.614       | 0.96        | 0.866-1.064 | 0.433       | 0.974       | 0.917-1.035 | 0.396       |
|                    | HLD             |         | 1.241       | 1.001-1.537  | 0.049       | 1.262       | 1.084-1.469  | 0.003       | 1.303       | 1.175-1.443 | <0.001      | 1.298       | 1.222-1.378 | <0.001      |

|                     |                 |        |              |             |        |              |             |        |             |             |        |             |             |        |  |
|---------------------|-----------------|--------|--------------|-------------|--------|--------------|-------------|--------|-------------|-------------|--------|-------------|-------------|--------|--|
|                     | COPD            |        | 1.447        | 0.991-2.113 | 0.056  | 1.364        | 1.043-1.783 | 0.024  | 1.475       | 1.240-1.756 | <0.001 | 1.252       | 1.126-1.392 | <0.001 |  |
|                     | COVID19         |        | 0.658        | 0.212-2.048 | 0.47   | 1.36         | 0.770-2.404 | 0.29   | 1.128       | 0.741-1.718 | 0.574  | 1.281       | 1.015-1.618 | 0.037  |  |
| Middle ear disease  | Vaccine         | Yes    | 2.726        | 1.575-4.718 | <0.001 | 2.063        | 1.495-2.848 | <0.001 | 2.123       | 1.710-2.635 | <0.001 | 2.222       | 1.966-2.511 | <0.001 |  |
|                     | Gender          | Female | 1.147        | 0.884-1.488 | 0.302  | 1.175        | 0.986-1.401 | 0.072  | 1.128       | 1.004-1.268 | 0.043  | 1.208       | 1.131-1.291 | <0.001 |  |
|                     | Age             |        | 1.002        | 0.993-1.012 | 0.628  | 0.994        | 0.987-1.000 | 0.049  | 0.996       | 0.992-1.000 | 0.082  | 0.996       | 0.994-0.998 | 0.001  |  |
|                     | Insurance Level | Low    |              |             |        |              |             |        |             |             |        |             |             |        |  |
|                     |                 | Middle | 1.135        | 0.795-1.621 | 0.485  | 1.141        | 0.899-1.447 | 0.279  | 1.079       | 0.920-1.265 | 0.35   | 1.039       | 0.950-1.136 | 0.403  |  |
|                     |                 | High   | 1.072        | 0.776-1.480 | 0.675  | 1.044        | 0.839-1.299 | 0.698  | 1.043       | 0.903-1.205 | 0.563  | 1.023       | 0.944-1.109 | 0.579  |  |
|                     | CCI             | 0      |              |             |        |              |             |        |             |             |        |             |             |        |  |
|                     |                 | 1      | 1.338        | 0.901-1.985 | 0.149  | 1.419        | 1.083-1.859 | 0.011  | 1.27        | 1.057-1.525 | 0.011  | 1.25        | 1.127-1.386 | <0.001 |  |
|                     |                 | 2≤     | 1.255        | 0.785-2.005 | 0.343  | 1.721        | 1.269-2.333 | <0.001 | 1.693       | 1.383-2.071 | <0.001 | 1.486       | 1.321-1.672 | <0.001 |  |
|                     | DM              |        | 1.014        | 0.661-1.556 | 0.95   | 0.865        | 0.647-1.157 | 0.33   | 0.819       | 0.672-0.998 | 0.048  | 0.875       | 0.781-0.982 | 0.023  |  |
|                     | HTN             |        | 1.077        | 0.764-1.520 | 0.671  | 1.055        | 0.832-1.338 | 0.659  | 1.057       | 0.902-1.239 | 0.494  | 0.981       | 0.896-1.074 | 0.681  |  |
|                     | HLD             |        | 1.122        | 0.789-1.596 | 0.521  | 1.215        | 0.953-1.548 | 0.116  | 1.149       | 0.978-1.351 | 0.091  | 1.113       | 1.016-1.221 | 0.022  |  |
| COPD                |                 | 1.268  | 0.698-2.302  | 0.435       | 1.114  | 0.734-1.690  | 0.613       | 1.092  | 0.824-1.447 | 0.541       | 1.235  | 1.056-1.445 | 0.008       |        |  |
| COVID19             |                 | 2.207  | 0.820-5.939  | 0.117       | 0.973  | 0.364-2.604  | 0.957       | 1.531  | 0.903-2.594 | 0.114       | 1.218  | 0.872-1.700 | 0.247       |        |  |
| Other ear disease   | Vaccine         | Yes    | 1.907        | 1.392-2.612 | <0.001 | 1.947        | 1.558-2.433 | <0.001 | 1.823       | 1.575-2.109 | <0.001 | 1.915       | 1.761-2.083 | <0.001 |  |
|                     | Gender          | Female | 1.054        | 0.896-1.240 | 0.525  | 1.088        | 0.971-1.220 | 0.146  | 1.111       | 1.028-1.200 | 0.008  | 1.133       | 1.085-1.184 | <0.001 |  |
|                     | Age             |        | 1.026        | 1.020-1.033 | <0.001 | 1.022        | 1.018-1.027 | <0.001 | 1.023       | 1.020-1.026 | <0.001 | 1.02        | 1.019-1.022 | <0.001 |  |
|                     | Insurance Level | Low    |              |             |        |              |             |        |             |             |        |             |             |        |  |
|                     |                 | Middle | 1.045        | 0.835-1.308 | 0.698  | 1.036        | 0.884-1.213 | 0.663  | 1.051       | 0.944-1.170 | 0.36   | 0.972       | 0.914-1.033 | 0.353  |  |
|                     |                 | High   | 1.035        | 0.850-1.261 | 0.73   | 1.045        | 0.910-1.201 | 0.531  | 1.083       | 0.986-1.190 | 0.097  | 1.029       | 0.976-1.085 | 0.289  |  |
|                     | CCI             | 0      |              |             |        |              |             |        |             |             |        |             |             |        |  |
|                     |                 | 1      | 1.308        | 1.029-1.664 | 0.029  | 1.269        | 1.070-1.505 | 0.006  | 1.131       | 1.006-1.271 | 0.04   | 1.121       | 1.048-1.199 | 0.001  |  |
|                     |                 | 2≤     | 1.649        | 1.269-2.141 | <0.001 | 1.447        | 1.196-1.750 | <0.001 | 1.273       | 1.117-1.451 | <0.001 | 1.197       | 1.109-1.291 | <0.001 |  |
|                     | DM              |        | 0.679        | 0.526-0.878 | 0.003  | 0.806        | 0.673-0.965 | 0.019  | 0.901       | 0.797-1.019 | 0.096  | 0.917       | 0.855-0.984 | 0.016  |  |
|                     | HTN             |        | 0.99         | 0.806-1.215 | 0.922  | 1.036        | 0.897-1.198 | 0.629  | 0.995       | 0.902-1.097 | 0.917  | 0.994       | 0.940-1.051 | 0.833  |  |
|                     | HLD             |        | 1.071        | 0.870-1.319 | 0.518  | 1.102        | 0.950-1.277 | 0.199  | 1.161       | 1.051-1.283 | 0.003  | 1.194       | 1.128-1.265 | <0.001 |  |
| COPD                |                 | 1.073  | 0.751-1.531  | 0.699       | 1.13   | 0.878-1.454  | 0.342       | 1.081  | 0.906-1.291 | 0.387       | 1.259  | 1.142-1.388 | <0.001      |        |  |
| COVID19             |                 | 0.849  | 0.317-2.271  | 0.744       | 1.16   | 0.640-2.102  | 0.625       | 1.403  | 0.972-2.025 | 0.07        | 1.215  | 0.971-1.520 | 0.088       |        |  |
| Periodontal disease | Vaccine         | Yes    | 0.965        | 0.366-2.546 | 0.943  | 1.771        | 0.760-4.126 | 0.186  | 1.662       | 0.955-2.893 | 0.073  | 2.106       | 1.459-3.041 | <0.001 |  |
|                     | Gender          | Female | 0.638        | 0.323-1.258 | 0.195  | 1.086        | 0.690-1.709 | 0.721  | 1.136       | 0.841-1.534 | 0.406  | 0.959       | 0.806-1.140 | 0.632  |  |
|                     | Age             |        | 1.028        | 1.003-1.053 | 0.027  | 1.024        | 1.006-1.041 | 0.007  | 1.025       | 1.013-1.037 | <0.001 | 1.032       | 1.025-1.039 | <0.001 |  |
|                     | Insurance Level | Low    |              |             |        |              |             |        |             |             |        |             |             |        |  |
|                     |                 | Middle | 1.856        | 0.684-5.033 | 0.224  | 1.083        | 0.577-2.034 | 0.804  | 0.729       | 0.488-1.087 | 0.121  | 0.81        | 0.642-1.022 | 0.076  |  |
|                     |                 | High   | 1.676        | 0.664-4.231 | 0.274  | 1.091        | 0.627-1.899 | 0.758  | 0.708       | 0.503-0.998 | 0.049  | 0.767       | 0.627-0.937 | 0.01   |  |
|                     | CCI             | 0      |              |             |        |              |             |        |             |             |        |             |             |        |  |
|                     |                 | 1      | 0.9          | 0.288-2.817 | 0.857  | 1.084        | 0.517-2.275 | 0.831  | 1.326       | 0.830-2.117 | 0.237  | 1.372       | 1.058-1.779 | 0.017  |  |
|                     |                 | 2≤     | 1.754        | 0.561-5.487 | 0.334  | 2.044        | 0.976-4.280 | 0.058  | 2.17        | 1.340-3.517 | 0.002  | 1.506       | 1.127-2.011 | 0.006  |  |
|                     | DM              |        | 1.272        | 0.425-3.808 | 0.667  | 1.38         | 0.692-2.753 | 0.361  | 1.25        | 0.809-1.932 | 0.314  | 1.218       | 0.950-1.562 | 0.12   |  |
|                     | HTN             |        | 0.595        | 0.244-1.452 | 0.254  | 1.034        | 0.582-1.840 | 0.908  | 1.172       | 0.805-1.706 | 0.408  | 1.06        | 0.857-1.311 | 0.59   |  |
|                     | HLD             |        | 0.833        | 0.331-2.098 | 0.699  | 0.75         | 0.412-1.365 | 0.346  | 0.793       | 0.539-1.168 | 0.241  | 1.091       | 0.875-1.361 | 0.438  |  |
| COPD                |                 | 1.686  | 0.464-6.126  | 0.427       | 0.824  | 0.289-2.351  | 0.717       | 1.013  | 0.548-1.872 | 0.968       | 1.337  | 0.959-1.864 | 0.086       |        |  |
| COVID19             |                 | 3.385  | 0.461-24.880 | 0.231       | 3.265  | 0.799-13.342 | 0.099       | 2.74   | 1.014-7.403 | 0.047       | 1.856  | 0.922-3.737 | 0.083       |        |  |

**Supplement table S5. The Cox proportional hazards model of non-fatal immune-related adverse events according to vaccine types**

| Disease            | Variables       | Value             | HR          | 95% CI      | P      |
|--------------------|-----------------|-------------------|-------------|-------------|--------|
| Endometriosis      | Vaccine         | No                |             |             |        |
|                    |                 | only mRNA vaccine | 1.603       | 1.285-2.000 | <0.001 |
|                    |                 | only cDNA vaccine | 1.078       | 0.798-1.455 | 0.627  |
|                    |                 | Cross             | 2.784       | 2.083-3.722 | <0.001 |
|                    | Gender          | Female            |             |             |        |
|                    | Age             |                   | 0.974       | 0.969-0.980 | <0.001 |
|                    | Insurance Level | Low               |             |             |        |
|                    |                 | Middle            | 1.004       | 0.813-1.240 | 0.968  |
|                    |                 | High              | 1.291       | 1.068-1.561 | 0.008  |
|                    | CCI             | 0                 |             |             |        |
|                    |                 | 1                 | 0.901       | 0.669-1.214 | 0.495  |
|                    |                 | 2≤                | 1.058       | 0.744-1.505 | 0.752  |
|                    | DM              |                   | 0.698       | 0.447-1.087 | 0.112  |
|                    | HTN             |                   | 0.617       | 0.448-0.850 | 0.003  |
|                    | HLD             |                   | 1.019       | 0.780-1.333 | 0.888  |
| COPD               |                 | 0.896             | 0.500-1.604 | 0.712       |        |
| COVID19            |                 | 1.445             | 0.686-3.044 | 0.332       |        |
| Menstrual disorder | Vaccine         | No                |             |             |        |
|                    |                 | only mRNA vaccine | 2.019       | 1.887-2.160 | <0.001 |
|                    |                 | only cDNA vaccine | 1.454       | 1.317-1.604 | <0.001 |
|                    |                 | Cross             | 2.837       | 2.582-3.117 | <0.001 |
|                    | Gender          | Female            |             |             |        |
|                    | Age             |                   | 0.947       | 0.945-0.948 | <0.001 |
|                    | Insurance Level | Low               |             |             |        |
|                    |                 | Middle            | 1.086       | 1.022-1.153 | 0.007  |
|                    |                 | High              | 1.063       | 1.003-1.127 | 0.039  |
|                    | CCI             | 0                 |             |             |        |
|                    |                 | 1                 | 1.339       | 1.228-1.459 | <0.001 |
|                    |                 | 2≤                | 1.298       | 1.156-1.458 | <0.001 |
|                    | DM              |                   | 0.833       | 0.721-0.963 | 0.014  |
|                    | HTN             |                   | 0.722       | 0.644-0.809 | <0.001 |
|                    | HLD             |                   | 0.88        | 0.800-0.968 | 0.009  |
| COPD               |                 | 1.025             | 0.872-1.204 | 0.765       |        |
| COVID19            |                 | 1.32              | 1.048-1.663 | 0.018       |        |
| Bruise             | Vaccine         | No                |             |             |        |
|                    |                 | only mRNA vaccine | 1.756       | 1.290-2.391 | <0.001 |
|                    |                 | only cDNA vaccine | 1.873       | 1.357-2.586 | <0.001 |
|                    |                 | Cross             | 1.891       | 1.208-2.962 | 0.005  |
|                    | Gender          | Female            | 1.529       | 1.297-1.803 | <0.001 |
|                    | Age             |                   | 1.011       | 1.005-1.017 | <0.001 |
|                    | Insurance Level | Low               |             |             |        |
|                    |                 | Middle            | 0.928       | 0.740-1.164 | 0.52   |
|                    |                 | High              | 1.093       | 0.901-1.326 | 0.367  |
|                    | CCI             | 0                 |             |             |        |
|                    |                 | 1                 | 1.248       | 0.973-1.600 | 0.081  |
|                    |                 | 2≤                | 2.095       | 1.627-2.698 | <0.001 |
|                    | DM              |                   | 0.765       | 0.597-0.980 | 0.034  |
|                    | HTN             |                   | 1.081       | 0.879-1.329 | 0.459  |
|                    | HLD             |                   | 1.198       | 0.970-1.478 | 0.093  |
| COPD               |                 | 0.798             | 0.538-1.183 | 0.261       |        |

|               |                 |                   |             |             |        |
|---------------|-----------------|-------------------|-------------|-------------|--------|
|               |                 | COVID19           | 1.032       | 0.428-2.490 | 0.944  |
| Herpes zoster | Vaccine         | No                |             |             |        |
|               |                 | only mRNA vaccine | 2.195       | 1.988-2.423 | <0.001 |
|               |                 | only cDNA vaccine | 2.465       | 2.225-2.730 | <0.001 |
|               |                 | Cross             | 2.894       | 2.539-3.298 | <0.001 |
|               | Gender          | Female            | 1.42        | 1.353-1.490 | <0.001 |
|               | Age             |                   | 1.018       | 1.016-1.019 | <0.001 |
|               | Insurance Level | Low               |             |             |        |
|               |                 | Middle            | 1.03        | 0.965-1.100 | 0.367  |
|               |                 | High              | 1.056       | 0.997-1.118 | 0.064  |
|               | CCI             | 0                 |             |             |        |
|               |                 | 1                 | 1.058       | 0.984-1.138 | 0.129  |
|               |                 | 2≤                | 1.103       | 1.015-1.199 | 0.02   |
|               | DM              |                   | 0.9         | 0.832-0.974 | 0.009  |
|               | HTN             |                   | 0.902       | 0.848-0.959 | 0.001  |
|               | HLD             |                   | 1.232       | 1.158-1.311 | <0.001 |
| COPD          |                 | 1.092             | 0.973-1.225 | 0.136       |        |
| COVID19       |                 | 1.237             | 0.970-1.576 | 0.086       |        |
| Alopecia      | Vaccine         | No                |             |             |        |
|               |                 | only mRNA vaccine | 2.304       | 1.815-2.924 | <0.001 |
|               |                 | only cDNA vaccine | 2.244       | 1.695-2.970 | <0.001 |
|               |                 | Cross             | 3.413       | 2.520-4.623 | <0.001 |
|               | Gender          | Female            | 1.013       | 0.885-1.161 | 0.847  |
|               | Age             |                   | 0.978       | 0.973-0.983 | <0.001 |
|               | Insurance Level | Low               |             |             |        |
|               |                 | Middle            | 0.851       | 0.706-1.025 | 0.089  |
|               |                 | High              | 0.955       | 0.810-1.126 | 0.583  |
|               | CCI             | 0                 |             |             |        |
|               |                 | 1                 | 1.249       | 0.994-1.571 | 0.056  |
|               |                 | 2≤                | 0.864       | 0.633-1.180 | 0.358  |
|               | DM              |                   | 0.765       | 0.566-1.035 | 0.082  |
|               | HTN             |                   | 0.711       | 0.569-0.889 | 0.003  |
|               | HLD             |                   | 1.306       | 1.059-1.611 | 0.013  |
| COPD          |                 | 0.993             | 0.639-1.543 | 0.974       |        |
| COVID19       |                 | 0.94              | 0.421-2.099 | 0.88        |        |
| Warts         | Vaccine         | No                |             |             |        |
|               |                 | only mRNA vaccine | 2.214       | 1.901-2.578 | <0.001 |
|               |                 | only cDNA vaccine | 2.577       | 2.155-3.082 | <0.001 |
|               |                 | Cross             | 2.35        | 1.898-2.910 | <0.001 |
|               | Gender          | Female            | 0.842       | 0.771-0.920 | <0.001 |
|               | Age             |                   | 0.966       | 0.963-0.969 | <0.001 |
|               | Insurance Level | Low               |             |             |        |
|               |                 | Middle            | 1.02        | 0.899-1.156 | 0.762  |
|               |                 | High              | 1.22        | 1.091-1.365 | <0.001 |
|               | CCI             | 0                 |             |             |        |
|               |                 | 1                 | 1.268       | 1.093-1.471 | 0.002  |
|               |                 | 2≤                | 1.231       | 1.023-1.482 | 0.028  |
|               | DM              |                   | 0.703       | 0.584-0.847 | <0.001 |
|               | HTN             |                   | 1.035       | 0.901-1.189 | 0.628  |
|               | HLD             |                   | 1.344       | 1.173-1.541 | <0.001 |
| COPD          |                 | 1.068             | 0.819-1.392 | 0.627       |        |
| COVID19       |                 | 1.086             | 0.673-1.750 | 0.736       |        |
|               |                 | No                |             |             |        |

|                   |                 |                   |             |              |        |
|-------------------|-----------------|-------------------|-------------|--------------|--------|
| Visual impairment | Vaccine         | only mRNA vaccine | 2.812       | 0.646-12.247 | 0.168  |
|                   |                 | only cDNA vaccine | 6.695       | 1.527-29.361 | 0.012  |
|                   |                 | Cross             | 2.897       | 0.407-20.626 | 0.288  |
|                   | Gender          | Female            | 0.656       | 0.375-1.146  | 0.139  |
|                   | Age             |                   | 1.007       | 0.984-1.031  | 0.533  |
|                   | Insurance Level | Low               |             |              |        |
|                   |                 | Middle            | 0.911       | 0.439-1.893  | 0.804  |
|                   |                 | High              | 0.858       | 0.447-1.649  | 0.647  |
|                   | CCI             | 0                 |             |              |        |
|                   |                 | 1                 | 0.78        | 0.319-1.908  | 0.586  |
|                   |                 | 2≤                | 1.352       | 0.548-3.337  | 0.513  |
|                   | DM              |                   | 0.734       | 0.299-1.801  | 0.5    |
|                   | HTN             |                   | 1.112       | 0.561-2.203  | 0.761  |
|                   | HLD             |                   | 1.32        | 0.651-2.677  | 0.441  |
| COPD              |                 | 1.21              | 0.350-4.180 | 0.763        |        |
| COVID19           |                 |                   |             |              |        |
| Glaucoma          | Vaccine         | No                |             |              |        |
|                   |                 | only mRNA vaccine | 1.652       | 1.505-1.813  | <0.001 |
|                   |                 | only cDNA vaccine | 1.811       | 1.642-1.997  | <0.001 |
|                   |                 | Cross             | 1.828       | 1.596-2.093  | <0.001 |
|                   | Gender          | Female            | 1.226       | 1.166-1.289  | <0.001 |
|                   | Age             |                   | 1.012       | 1.010-1.014  | <0.001 |
|                   | Insurance Level | Low               |             |              |        |
|                   |                 | Middle            | 0.928       | 0.863-0.998  | 0.045  |
|                   |                 | High              | 1.25        | 1.176-1.329  | <0.001 |
|                   | CCI             | 0                 |             |              |        |
|                   |                 | 1                 | 1.13        | 1.046-1.221  | 0.002  |
|                   |                 | 2≤                | 1.174       | 1.075-1.282  | <0.001 |
|                   | DM              |                   | 0.924       | 0.850-1.003  | 0.059  |
|                   | HTN             |                   | 0.981       | 0.919-1.046  | 0.553  |
| HLD               |                 | 1.25              | 1.169-1.335 | <0.001       |        |
| COPD              |                 | 1.06              | 0.938-1.199 | 0.349        |        |
| COVID19           |                 | 1.234             | 0.957-1.592 | 0.105        |        |
| Tinnitus          | Vaccine         | No                |             |              |        |
|                   |                 | only mRNA vaccine | 1.783       | 1.513-2.102  | <0.001 |
|                   |                 | only cDNA vaccine | 1.85        | 1.553-2.205  | <0.001 |
|                   |                 | Cross             | 1.494       | 1.157-1.929  | 0.002  |
|                   | Gender          | Female            | 1.22        | 1.115-1.334  | <0.001 |
|                   | Age             |                   | 1.008       | 1.005-1.011  | <0.001 |
|                   | Insurance Level | Low               |             |              |        |
|                   |                 | Middle            | 1.037       | 0.918-1.171  | 0.563  |
|                   |                 | High              | 1.011       | 0.907-1.128  | 0.838  |
|                   | CCI             | 0                 |             |              |        |
|                   |                 | 1                 | 1.138       | 0.991-1.308  | 0.067  |
|                   |                 | 2≤                | 1.175       | 1.002-1.379  | 0.048  |
|                   | DM              |                   | 0.886       | 0.761-1.031  | 0.116  |
|                   | HTN             |                   | 0.921       | 0.818-1.037  | 0.172  |
| HLD               |                 | 1.311             | 1.163-1.478 | <0.001       |        |
| COPD              |                 | 1.045             | 0.834-1.310 | 0.701        |        |
| COVID19           |                 | 1.118             | 0.693-1.802 | 0.648        |        |
|                   | Vaccine         | No                |             |              |        |
|                   |                 | only mRNA vaccine | 2.361       | 2.143-2.602  | <0.001 |
|                   |                 | only cDNA vaccine | 2.445       | 2.210-2.705  | <0.001 |

|                    |                 |                   |             |             |        |
|--------------------|-----------------|-------------------|-------------|-------------|--------|
| Inner ear disease  |                 | Cross             | 2.111       | 1.835-2.428 | <0.001 |
|                    | Gender          | Female            | 2.001       | 1.904-2.102 | <0.001 |
|                    | Age             |                   | 1.015       | 1.013-1.016 | <0.001 |
|                    | Insurance Level | Low               |             |             |        |
|                    |                 | Middle            | 1.031       | 0.967-1.099 | 0.346  |
|                    |                 | High              | 1.051       | 0.994-1.112 | 0.083  |
|                    | CCI             | 0                 |             |             |        |
|                    |                 | 1                 | 1.151       | 1.074-1.233 | <0.001 |
|                    |                 | 2≤                | 1.176       | 1.085-1.274 | <0.001 |
|                    | DM              |                   | 0.77        | 0.713-0.832 | <0.001 |
|                    | HTN             |                   | 0.974       | 0.918-1.035 | 0.399  |
|                    | HLD             |                   | 1.291       | 1.216-1.371 | <0.001 |
|                    | COPD            |                   | 1.253       | 1.127-1.393 | <0.001 |
|                    | COVID19         |                   | 1.282       | 1.016-1.617 | 0.036  |
| Middle ear disease | Vaccine         | No                |             |             |        |
|                    |                 | only mRNA vaccine | 2.244       | 1.981-2.541 | <0.001 |
|                    |                 | only cDNA vaccine | 2.167       | 1.893-2.482 | <0.001 |
|                    |                 | Cross             | 2.099       | 1.758-2.506 | <0.001 |
|                    | Gender          | Female            | 1.207       | 1.130-1.289 | <0.001 |
|                    | Age             |                   | 0.996       | 0.994-0.999 | 0.002  |
|                    | Insurance Level | Low               |             |             |        |
|                    |                 | Middle            | 1.038       | 0.949-1.135 | 0.412  |
|                    |                 | High              | 1.021       | 0.942-1.107 | 0.606  |
|                    | CCI             | 0                 |             |             |        |
|                    |                 | 1                 | 1.251       | 1.128-1.387 | <0.001 |
|                    |                 | 2≤                | 1.488       | 1.322-1.673 | <0.001 |
|                    | DM              |                   | 0.875       | 0.780-0.981 | 0.022  |
|                    | HTN             |                   | 0.981       | 0.896-1.074 | 0.675  |
| HLD                |                 | 1.114             | 1.016-1.222 | 0.021       |        |
| COPD               |                 | 1.236             | 1.057-1.446 | 0.008       |        |
| COVID19            |                 | 1.219             | 0.874-1.701 | 0.244       |        |
| Other ear disease  | Vaccine         | No                |             |             |        |
|                    |                 | only mRNA vaccine | 2.006       | 1.840-2.186 | <0.001 |
|                    |                 | only cDNA vaccine | 1.752       | 1.601-1.917 | <0.001 |
|                    |                 | Cross             | 1.755       | 1.541-2.000 | <0.001 |
|                    | Gender          | Female            | 1.128       | 1.080-1.179 | <0.001 |
|                    | Age             |                   | 1.021       | 1.019-1.023 | <0.001 |
|                    | Insurance Level | Low               |             |             |        |
|                    |                 | Middle            | 0.969       | 0.912-1.030 | 0.317  |
|                    |                 | High              | 1.02        | 0.968-1.076 | 0.459  |
|                    | CCI             | 0                 |             |             |        |
|                    |                 | 1                 | 1.124       | 1.051-1.202 | 0.001  |
|                    |                 | 2≤                | 1.196       | 1.109-1.291 | <0.001 |
|                    | DM              |                   | 0.917       | 0.854-0.983 | 0.015  |
|                    | HTN             |                   | 0.992       | 0.938-1.049 | 0.77   |
| HLD                |                 | 1.204             | 1.137-1.275 | <0.001      |        |
| COPD               |                 | 1.258             | 1.142-1.386 | <0.001      |        |
| COVID19            |                 | 1.218             | 0.974-1.522 | 0.083       |        |
|                    | Vaccine         | No                |             |             |        |
|                    |                 | only mRNA vaccine | 1.84        | 1.259-2.688 | 0.002  |
|                    |                 | only cDNA vaccine | 2.197       | 1.501-3.217 | <0.001 |
|                    | Gender          | Female            | 0.958       | 0.805-1.140 | 0.627  |

|                    |                 |        |       |             |        |
|--------------------|-----------------|--------|-------|-------------|--------|
| Peridontal disease | Age             |        | 1.034 | 1.027-1.041 | <0.001 |
|                    | Insurance Level | Low    |       |             |        |
|                    |                 | Middle | 0.822 | 0.651-1.037 | 0.098  |
|                    |                 | High   | 0.78  | 0.638-0.954 | 0.015  |
|                    | CCI             | 0      |       |             |        |
|                    |                 | 1      | 1.364 | 1.052-1.769 | 0.019  |
|                    |                 | 2≤     | 1.504 | 1.127-2.008 | 0.006  |
|                    | DM              |        | 1.222 | 0.953-1.567 | 0.114  |
|                    | HTN             |        | 1.064 | 0.861-1.315 | 0.567  |
|                    | HLD             |        | 1.08  | 0.867-1.346 | 0.493  |
|                    | COPD            |        | 1.343 | 0.964-1.872 | 0.081  |
|                    | COVID19         |        | 1.863 | 0.926-3.750 | 0.081  |

**Supplement table S6. Multivariate logistic regression model of non-fatal immune-related adverse events according to vaccine types**

| Disease            | Variable        | Value             | One week    |              |              | Two weeks   |              |             | One month   |             |             | Three months |             |        |
|--------------------|-----------------|-------------------|-------------|--------------|--------------|-------------|--------------|-------------|-------------|-------------|-------------|--------------|-------------|--------|
|                    |                 |                   | OR          | 95% CI       | P            | OR          | 95% CI       | P           | OR          | 95% CI      | P           | OR           | 95% CI      | P      |
| Endometriosis      | Vaccine         | No                |             |              |              |             |              |             |             |             |             |              |             |        |
|                    |                 | only mRNA vaccine | 2.262       | 0.776-6.593  | 0.135        | 1.287       | 0.687-2.409  | 0.431       | 1.227       | 0.836-1.801 | 0.296       | 1.605        | 1.286-2.003 | <0.001 |
|                    |                 | only cDNA vaccine | 2.424       | 0.668-8.789  | 0.178        | 1.364       | 0.607-3.063  | 0.452       | 1.14        | 0.688-1.889 | 0.61        | 1.079        | 0.799-1.458 | 0.62   |
|                    |                 | Cross             | 3.282       | 0.817-13.193 | 0.094        | 1.77        | 0.704-4.450  | 0.225       | 1.752       | 1.000-3.069 | 0.05        | 2.789        | 2.086-3.729 | <0.001 |
|                    | Gender          | Female            |             |              |              |             |              |             |             |             |             |              |             |        |
|                    | Age             |                   | 0.975       | 0.951-0.999  | 0.045        | 0.978       | 0.962-0.995  | 0.013       | 0.974       | 0.964-0.985 | <0.001      | 0.974        | 0.969-0.980 | <0.001 |
|                    | Insurance Level | Low               |             |              |              |             |              |             |             |             |             |              |             |        |
|                    |                 | Middle            | 0.806       | 0.334-1.943  | 0.631        | 1.094       | 0.547-2.186  | 0.8         | 1.159       | 0.775-1.731 | 0.473       | 1.004        | 0.813-1.240 | 0.967  |
|                    |                 | High              | 1.074       | 0.495-2.329  | 0.857        | 1.852       | 1.012-3.387  | 0.046       | 1.511       | 1.051-2.174 | 0.026       | 1.291        | 1.068-1.561 | 0.008  |
|                    | CCI             | 0                 |             |              |              |             |              |             |             |             |             |              |             |        |
|                    |                 | 1                 | 0.423       | 0.083-2.155  | 0.3          | 0.535       | 0.176-1.626  | 0.27        | 0.816       | 0.466-1.431 | 0.478       | 0.901        | 0.669-1.214 | 0.494  |
|                    |                 | 2≤                | 0.293       | 0.031-2.809  | 0.287        | 0.286       | 0.056-1.457  | 0.132       | 0.696       | 0.338-1.430 | 0.324       | 1.056        | 0.743-1.502 | 0.76   |
|                    | DM              | 0.768             | 0.066-8.942 | 0.833        | 1.452        | 0.307-6.859 | 0.638        | 0.977       | 0.447-2.134 | 0.954       | 0.697       | 0.447-1.087  | 0.112       |        |
|                    | HTN             | 0.568             | 0.146-2.215 | 0.415        | 0.361        | 0.117-1.115 | 0.077        | 0.701       | 0.401-1.226 | 0.213       | 0.617       | 0.448-0.849  | 0.003       |        |
| HLD                | 1.339           | 0.460-3.898       | 0.593       | 1.05         | 0.462-2.387  | 0.907       | 1.075        | 0.661-1.749 | 0.77        | 1.02        | 0.780-1.334 | 0.884        |             |        |
| COPD               | 0               | 0.000-0.0         | 0.979       | 0            | 0.000-0.0    | 0.98        | 0.79         | 0.238-2.629 | 0.701       | 0.895       | 0.500-1.603 | 0.71         |             |        |
| COVID19            | 0               | 0.000-0.0         | 0.988       | 1.957        | 0.272-14.082 | 0.505       | 1.407        | 0.349-5.671 | 0.631       | 1.445       | 0.685-3.044 | 0.333        |             |        |
| Menstrual disorder | Vaccine         | No                |             |              |              |             |              |             |             |             |             |              |             |        |
|                    |                 | only mRNA vaccine | 1.693       | 1.328-2.159  | <0.001       | 1.782       | 1.499-2.118  | <0.001      | 1.866       | 1.659-2.098 | <0.001      | 2.034        | 1.900-2.177 | <0.001 |
|                    |                 | only cDNA vaccine | 1.354       | 0.950-1.930  | 0.093        | 1.544       | 1.209-1.972  | 0.001       | 1.453       | 1.227-1.720 | <0.001      | 1.461        | 1.323-1.612 | <0.001 |
|                    |                 | Cross             | 2.01        | 1.392-2.902  | <0.001       | 2.579       | 2.021-3.291  | <0.001      | 2.858       | 2.432-3.360 | <0.001      | 2.859        | 2.600-3.143 | <0.001 |
|                    | Gender          | Female            |             |              |              |             |              |             |             |             |             |              |             |        |
|                    | Age             |                   | 0.945       | 0.938-0.952  | <0.001       | 0.945       | 0.941-0.950  | <0.001      | 0.947       | 0.944-0.950 | <0.001      | 0.946        | 0.944-0.948 | <0.001 |
|                    | Insurance Level | Low               |             |              |              |             |              |             |             |             |             |              |             |        |
|                    |                 | Middle            | 1.02        | 0.817-1.274  | 0.858        | 1.022       | 0.873-1.197  | 0.785       | 1.085       | 0.976-1.206 | 0.133       | 1.086        | 1.022-1.154 | 0.008  |
|                    |                 | High              | 0.923       | 0.743-1.146  | 0.468        | 1.05        | 0.903-1.220  | 0.527       | 1.043       | 0.942-1.156 | 0.415       | 1.065        | 1.004-1.129 | 0.036  |
|                    | CCI             | 0                 |             |              |              |             |              |             |             |             |             |              |             |        |
|                    |                 | 1                 | 1.557       | 1.144-2.120  | 0.005        | 1.365       | 1.093-1.703  | 0.006       | 1.331       | 1.145-1.547 | <0.001      | 1.343        | 1.231-1.464 | <0.001 |
|                    |                 | 2≤                | 1.414       | 0.928-2.154  | 0.107        | 1.341       | 0.998-1.801  | 0.051       | 1.216       | 0.990-1.494 | 0.062       | 1.3          | 1.156-1.461 | <0.001 |
|                    | DM              | 1.07              | 0.662-1.728 | 0.783        | 0.848        | 0.593-1.212 | 0.366        | 0.893       | 0.699-1.142 | 0.367       | 0.832       | 0.719-0.962  | 0.013       |        |
|                    | HTN             | 0.658             | 0.434-0.996 | 0.048        | 0.666        | 0.498-0.891 | 0.006        | 0.754       | 0.621-0.916 | 0.004       | 0.723       | 0.645-0.810  | <0.001      |        |
| HLD                | 1.016           | 0.720-1.434       | 0.929       | 1.05         | 0.828-1.331  | 0.689       | 0.932        | 0.791-1.099 | 0.404       | 0.88        | 0.799-0.969 | 0.009        |             |        |
| COPD               | 0.95            | 0.525-1.716       | 0.864       | 0.945        | 0.617-1.448  | 0.796       | 1.03         | 0.777-1.367 | 0.836       | 1.026       | 0.872-1.207 | 0.756        |             |        |
| COVID19            | 1.258           | 0.521-3.037       | 0.611       | 1.72         | 1.014-2.918  | 0.044       | 1.507        | 1.030-2.207 | 0.035       | 1.324       | 1.048-1.672 | 0.019        |             |        |
| Bruise             | Vaccine         | No                |             |              |              |             |              |             |             |             |             |              |             |        |
|                    |                 | only mRNA vaccine | 4.342       | 1.565-12.041 | 0.005        | 4.199       | 1.828-9.645  | 0.001       | 3.769       | 2.034-6.985 | <0.001      | 1.766        | 1.297-2.404 | <0.001 |
|                    |                 | only cDNA vaccine | 5.767       | 2.010-16.543 | 0.001        | 6.26        | 2.680-14.621 | <0.001      | 4.996       | 2.659-9.388 | <0.001      | 1.884        | 1.365-2.600 | <0.001 |
|                    |                 | Cross             | 2.658       | 0.664-10.645 | 0.167        | 3.515       | 1.219-10.139 | 0.02        | 3.457       | 1.568-7.622 | 0.002       | 1.9          | 1.214-2.976 | 0.005  |
|                    | Gender          | Female            | 1.52        | 1.034-2.234  | 0.033        | 1.746       | 1.291-2.360  | <0.001      | 1.634       | 1.290-2.071 | <0.001      | 1.53         | 1.298-1.803 | <0.001 |
|                    | Age             |                   | 0.991       | 0.976-1.006  | 0.227        | 0.995       | 0.984-1.007  | 0.403       | 1.001       | 0.992-1.010 | 0.853       | 1.011        | 1.005-1.017 | 0.001  |
|                    | Insurance Level | Low               |             |              |              |             |              |             |             |             |             |              |             |        |
|                    |                 | Middle            | 0.815       | 0.486-1.368  | 0.439        | 0.784       | 0.521-1.179  | 0.243       | 0.968       | 0.703-1.334 | 0.843       | 0.928        | 0.740-1.164 | 0.52   |
|                    |                 | High              | 0.941       | 0.604-1.468  | 0.789        | 1.008       | 0.717-1.416  | 0.965       | 1.088       | 0.824-1.436 | 0.552       | 1.093        | 0.901-1.326 | 0.366  |
|                    | CCI             | 0                 |             |              |              |             |              |             |             |             |             |              |             |        |
|                    |                 | 1                 | 1.115       | 0.627-1.982  | 0.711        | 1.458       | 0.952-2.232  | 0.083       | 1.546       | 1.100-2.173 | 0.012       | 1.248        | 0.973-1.600 | 0.082  |
|                    |                 | 2≤                | 1.185       | 0.618-2.274  | 0.609        | 1.951       | 1.238-3.074  | 0.004       | 2.328       | 1.631-3.322 | <0.001      | 2.092        | 1.625-2.694 | <0.001 |
|                    | DM              | 0.823             | 0.448-1.513 | 0.531        | 0.682        | 0.441-1.054 | 0.085        | 0.71        | 0.504-1.000 | 0.05        | 0.765       | 0.597-0.980  | 0.034       |        |
|                    | HTN             | 0.834             | 0.514-1.352 | 0.461        | 1.027        | 0.714-1.478 | 0.884        | 0.958       | 0.717-1.281 | 0.774       | 1.081       | 0.879-1.329  | 0.461       |        |
| HLD                | 2.439           | 1.486-4.002       | <0.001      | 1.911        | 1.311-2.786  | 0.001       | 1.523        | 1.130-2.052 | 0.006       | 1.199       | 0.971-1.480 | 0.091        |             |        |
| COPD               | 0.824           | 0.291-2.329       | 0.715       | 0.559        | 0.243-1.288  | 0.172       | 0.669        | 0.369-1.213 | 0.185       | 0.796       | 0.537-1.181 | 0.258        |             |        |
| COVID19            | 1.177           | 0.164-8.440       | 0.871       | 1.389        | 0.344-5.599  | 0.644       | 1.285        | 0.412-4.011 | 0.666       | 1.03        | 0.427-2.485 | 0.948        |             |        |
| Herpes zoster      | Vaccine         | No                |             |              |              |             |              |             |             |             |             |              |             |        |
|                    |                 | only mRNA vaccine | 2.385       | 1.635-3.479  | <0.001       | 2.47        | 1.909-3.197  | <0.001      | 2.103       | 1.781-2.483 | <0.001      | 2.211        | 2.002-2.441 | <0.001 |
|                    |                 | only cDNA vaccine | 3.116       | 2.109-4.603  | <0.001       | 3.002       | 2.300-3.918  | <0.001      | 2.527       | 2.128-3.001 | <0.001      | 2.483        | 2.242-2.751 | <0.001 |
|                    |                 | Cross             | 1.873       | 1.066-3.288  | 0.029        | 2.5         | 1.753-3.566  | <0.001      | 2.648       | 2.117-3.313 | <0.001      | 2.915        | 2.557-3.323 | <0.001 |
|                    | Gender          | Female            | 1.5         | 1.252-1.796  | <0.001       | 1.518       | 1.345-1.714  | <0.001      | 1.449       | 1.335-1.573 | <0.001      | 1.422        | 1.355-1.492 | <0.001 |
|                    | Age             |                   | 1.012       | 1.005-1.019  | 0.001        | 1.014       | 1.009-1.018  | <0.001      | 1.016       | 1.013-1.019 | <0.001      | 1.018        | 1.016-1.019 | <0.001 |
|                    | Insurance Level | Low               |             |              |              |             |              |             |             |             |             |              |             |        |
|                    |                 | Middle            | 1.106       | 0.871-1.405  | 0.409        | 1.053       | 0.896-1.237  | 0.531       | 1.032       | 0.924-1.152 | 0.582       | 1.03         | 0.965-1.100 | 0.368  |
|                    |                 | High              | 1.017       | 0.818-1.263  | 0.88         | 1.007       | 0.872-1.163  | 0.927       | 1.05        | 0.952-1.158 | 0.329       | 1.056        | 0.997-1.119 | 0.063  |
|                    | CCI             | 0                 |             |              |              |             |              |             |             |             |             |              |             |        |
|                    |                 | 1                 | 1.145       | 0.872-1.503  | 0.331        | 1.16        | 0.969-1.390  | 0.106       | 1.156       | 1.023-1.306 | 0.02        | 1.058        | 0.983-1.138 | 0.131  |
|                    |                 | 2≤                | 1.062       | 0.771-1.462  | 0.712        | 1.148       | 0.932-1.414  | 0.195       | 1.137       | 0.987-1.310 | 0.075       | 1.101        | 1.013-1.197 | 0.023  |
|                    | DM              | 1.139             | 0.848-1.529 | 0.388        | 0.983        | 0.808-1.195 | 0.864        | 0.924       | 0.808-1.055 | 0.242       | 0.9         | 0.832-0.974  | 0.009       |        |
|                    | HTN             | 0.746             | 0.591-0.940 | 0.013        | 0.792        | 0.679-0.924 | 0.003        | 0.886       | 0.799-0.984 | 0.023       | 0.901       | 0.848-0.959  | 0.001       |        |
| HLD                | 1.228           | 0.971-1.553       | 0.086       | 1.28         | 1.095-1.495  | 0.002       | 1.203        | 1.083-1.337 | 0.001       | 1.234       | 1.160-1.313 | <0.001       |             |        |
| COPD               | 0.965           | 0.609-1.528       | 0.878       | 0.991        | 0.735-1.336  | 0.955       | 1.073        | 0.882-1.304 | 0.483       | 1.09        | 0.971-1.224 | 0.144        |             |        |
| COVID19            | 1.843           | 0.873-3.889       | 0.109       | 1.41         | 0.797-2.491  | 0.238       | 1.62         | 1.129-2.325 | 0.009       | 1.235       | 0.968-1.575 | 0.089        |             |        |
| Alopecia           | Vaccine         | No                |             |              |              |             |              |             |             |             |             |              |             |        |
|                    |                 | only mRNA vaccine | 2.717       | 1.148-6.432  | 0.023        | 3.202       | 1.654-6.197  | 0.001       | 2.901       | 1.873-4.494 | <0.001      | 2.307        | 1.818-2.928 | <0.001 |
|                    |                 | only cDNA vaccine | 2.44        | 0.864-6.892  | 0.092        | 2.647       | 1.229-5.703  | 0.013       | 2.53        | 1.520-4.211 | <0.001      | 2.247        | 1.698-2.974 | <0.001 |
|                    |                 | Cross             | 3.739       | 1.248-11.198 | 0.018        | 3.721       | 1.602-8.642  | 0.002       | 3.686       | 2.118-6.415 | <0.001      | 3.419        | 2.524-4.632 | <0.001 |
|                    | Gender          | Female            | 0.668       | 0.408-1.092  | 0.108        | 0.926       | 0.656-1.306  | 0.66        | 0.832       | 0.659-1.050 | 0.122       | 1.014        | 0.885-1.161 | 0.845  |
|                    | Age             |                   | 0.972       | 0.954-0.990  | 0.002        | 0.98        | 0.968-0.993  | 0.002       | 0.979       | 0.971-0.988 | <0.001      | 0.978        | 0.973-0.983 | <0.001 |
|                    | Insurance Level | Low               |             |              |              |             |              |             |             |             |             |              |             |        |
|                    |                 | Middle            | 0.715       | 0.357-1.434  | 0.345        | 0.758       | 0.472-1.217  | 0.252       | 0.947       | 0.685-1.310 | 0.743       | 0.851        | 0.706-1.025 | 0.089  |
|                    |                 | High              | 1.046       | 0.584-1.873  | 0.879        | 0.9         | 0.597-1.358  | 0.616       | 1.049       | 0.785-1.400 | 0.747       | 0.955        | 0.810-1.126 | 0.584  |
|                    | CCI             | 0                 |             |              |              |             |              |             |             |             |             |              |             |        |
|                    |                 | 1                 | 0.815       | 0.305-2.175  | 0.683        | 0.697       | 0.349-1.392  | 0.307       |             |             |             |              |             |        |



|                    |                 |                   |             |              |        |             |              |        |             |             |        |             |              |        |
|--------------------|-----------------|-------------------|-------------|--------------|--------|-------------|--------------|--------|-------------|-------------|--------|-------------|--------------|--------|
| Visual impairment  | vaccine         | only cDNA vaccine |             |              |        |             |              |        |             |             |        | 6.728       | 1.535-29.489 | 0.011  |
|                    |                 | Cross             |             |              |        |             |              |        |             |             |        | 2.909       | 0.409-20.710 | 0.286  |
|                    | Gender          | Female            | 0.572       | 0.092-3.550  | 0.549  | 0.47        | 0.115-1.920  | 0.293  | 0.498       | 0.209-1.183 | 0.114  | 0.656       | 0.376-1.147  | 0.139  |
|                    |                 | Age               | 1.078       | 0.975-1.191  | 0.143  | 1.053       | 0.979-1.133  | 0.165  | 1.038       | 1.000-1.078 | 0.051  | 1.007       | 0.984-1.031  | 0.536  |
|                    | Insurance Level | Low               |             |              |        |             |              |        |             |             |        |             |              |        |
|                    |                 | Middle            | 0.615       | 0.055-6.828  | 0.693  | 0.29        | 0.032-2.606  | 0.269  | 1.085       | 0.405-2.908 | 0.871  | 0.911       | 0.439-1.893  | 0.804  |
|                    |                 | High              | 0.558       | 0.078-4.012  | 0.562  | 0.584       | 0.145-2.353  | 0.449  | 0.487       | 0.176-1.351 | 0.167  | 0.859       | 0.447-1.649  | 0.647  |
|                    | CCI             | 0                 |             |              |        |             |              |        |             |             |        |             |              |        |
|                    |                 | 1                 | 1.299       | 0.067-25.051 | 0.862  | 1.649       | 0.216-12.564 | 0.629  | 0.714       | 0.178-2.863 | 0.634  | 0.78        | 0.319-1.908  | 0.586  |
|                    |                 | 2≤                | 2.906       | 0.178-47.312 | 0.454  | 1.456       | 0.151-14.063 | 0.745  | 2.118       | 0.628-7.149 | 0.227  | 1.35        | 0.547-3.333  | 0.515  |
|                    |                 | DM                | 0.658       | 0.085-5.099  | 0.689  | 1.072       | 0.217-5.307  | 0.932  | 0.559       | 0.167-1.868 | 0.345  | 0.734       | 0.299-1.802  | 0.5    |
|                    |                 | HTN               | 2.152       | 0.198-23.444 | 0.529  | 2.248       | 0.396-12.774 | 0.361  | 1.398       | 0.519-3.770 | 0.507  | 1.112       | 0.561-2.202  | 0.762  |
|                    |                 | HLD               | 2.563       | 0.228-28.877 | 0.446  | 2.245       | 0.380-13.252 | 0.372  | 1.022       | 0.373-2.798 | 0.966  | 1.322       | 0.652-2.679  | 0.439  |
|                    |                 | COPD              | 1.97        | 0.193-20.135 | 0.568  | 3.236       | 0.572-18.311 | 0.184  | 1.993       | 0.528-7.529 | 0.309  | 1.208       | 0.350-4.173  | 0.765  |
|                    | COVID19         |                   |             |              |        |             |              |        |             |             |        |             |              |        |
| Glaucoma           | Vaccine         | No                |             |              |        |             |              |        |             |             |        |             |              |        |
|                    |                 | only mRNA vaccine | 1.469       | 1.055-2.046  | 0.023  | 1.631       | 1.282-2.074  | <0.001 | 1.405       | 1.204-1.640 | <0.001 | 1.662       | 1.514-1.824  | <0.001 |
|                    |                 | only cDNA vaccine | 1.773       | 1.254-2.508  | 0.001  | 1.978       | 1.540-2.540  | <0.001 | 1.604       | 1.363-1.887 | <0.001 | 1.822       | 1.652-2.010  | <0.001 |
|                    |                 | Cross             | 1.692       | 1.039-2.758  | 0.035  | 2.233       | 1.604-3.110  | <0.001 | 1.814       | 1.451-2.266 | <0.001 | 1.838       | 1.605-2.104  | <0.001 |
|                    | Gender          | Female            | 1.221       | 1.017-1.466  | 0.032  | 1.292       | 1.137-1.467  | <0.001 | 1.21        | 1.109-1.320 | <0.001 | 1.227       | 1.167-1.290  | <0.001 |
|                    |                 | Age               | 1.013       | 1.006-1.021  | <0.001 | 1.014       | 1.009-1.019  | <0.001 | 1.014       | 1.010-1.017 | <0.001 | 1.012       | 1.010-1.014  | <0.001 |
|                    | Insurance Level | Low               |             |              |        |             |              |        |             |             |        |             |              |        |
|                    |                 | Middle            | 0.996       | 0.756-1.312  | 0.979  | 0.993       | 0.825-1.195  | 0.938  | 0.962       | 0.850-1.090 | 0.545  | 0.928       | 0.863-0.998  | 0.045  |
|                    |                 | High              | 1.493       | 1.187-1.878  | 0.001  | 1.333       | 1.140-1.559  | <0.001 | 1.213       | 1.091-1.349 | <0.001 | 1.251       | 1.177-1.330  | <0.001 |
|                    | CCI             | 0                 |             |              |        |             |              |        |             |             |        |             |              |        |
|                    |                 | 1                 | 1.108       | 0.839-1.462  | 0.471  | 1.111       | 0.915-1.349  | 0.286  | 1.112       | 0.973-1.271 | 0.119  | 1.13        | 1.046-1.221  | 0.002  |
|                    |                 | 2≤                | 1.031       | 0.745-1.427  | 0.853  | 1.049       | 0.836-1.315  | 0.679  | 1.079       | 0.925-1.260 | 0.333  | 1.172       | 1.073-1.280  | <0.001 |
|                    |                 | DM                | 0.803       | 0.589-1.094  | 0.164  | 0.958       | 0.776-1.183  | 0.69   | 0.976       | 0.846-1.125 | 0.735  | 0.924       | 0.850-1.003  | 0.06   |
|                    |                 | HTN               | 1           | 0.790-1.267  | 0.997  | 1.001       | 0.849-1.179  | 0.992  | 0.931       | 0.832-1.042 | 0.216  | 0.98        | 0.918-1.046  | 0.548  |
|                    | HLD             | 1.304             | 1.027-1.657 | 0.029        | 1.208  | 1.023-1.428 | 0.026        | 1.336  | 1.191-1.498 | <0.001      | 1.252  | 1.171-1.337 | <0.001       |        |
|                    | COPD            | 1.028             | 0.647-1.632 | 0.908        | 1.101  | 0.807-1.502 | 0.543        | 1.135  | 0.921-1.399 | 0.235       | 1.058  | 0.936-1.197 | 0.366        |        |
|                    | COVID19         | 2.237             | 1.111-4.504 | 0.024        | 1.464  | 0.807-2.654 | 0.209        | 1.04   | 0.645-1.678 | 0.872       | 1.232  | 0.955-1.590 | 0.109        |        |
| Tinnitus           | Vaccine         | No                |             |              |        |             |              |        |             |             |        |             |              |        |
|                    |                 | only mRNA vaccine | 2.024       | 1.066-3.843  | 0.031  | 1.616       | 1.057-2.470  | 0.027  | 1.803       | 1.346-2.414 | <0.001 | 1.792       | 1.521-2.112  | <0.001 |
|                    |                 | only cDNA vaccine | 1.746       | 0.879-3.470  | 0.112  | 1.494       | 0.949-2.354  | 0.083  | 1.577       | 1.151-2.159 | 0.005  | 1.861       | 1.562-2.217  | <0.001 |
|                    |                 | Cross             | 0.802       | 0.224-2.877  | 0.735  | 0.795       | 0.345-1.834  | 0.591  | 1.242       | 0.762-2.026 | 0.384  | 1.5         | 1.162-1.937  | 0.002  |
|                    | Gender          | Female            | 1.374       | 0.966-1.954  | 0.077  | 1.191       | 0.932-1.521  | 0.163  | 1.177       | 0.999-1.386 | 0.052  | 1.22        | 1.115-1.335  | <0.001 |
|                    |                 | Age               | 1.013       | 1.000-1.026  | 0.047  | 1.014       | 1.004-1.023  | 0.004  | 1.011       | 1.005-1.017 | <0.001 | 1.008       | 1.005-1.011  | <0.001 |
|                    | Insurance Level | Low               |             |              |        |             |              |        |             |             |        |             |              |        |
|                    |                 | Middle            | 1.162       | 0.732-1.846  | 0.524  | 1.127       | 0.814-1.561  | 0.47   | 1.101       | 0.884-1.372 | 0.389  | 1.037       | 0.918-1.171  | 0.563  |
|                    |                 | High              | 0.947       | 0.616-1.456  | 0.805  | 0.946       | 0.700-1.277  | 0.715  | 0.974       | 0.797-1.190 | 0.794  | 1.012       | 0.907-1.129  | 0.835  |
|                    | CCI             | 0                 |             |              |        |             |              |        |             |             |        |             |              |        |
|                    |                 | 1                 | 1.096       | 0.640-1.877  | 0.738  | 1.22        | 0.841-1.769  | 0.295  | 1.098       | 0.850-1.418 | 0.473  | 1.138       | 0.990-1.308  | 0.068  |
|                    |                 | 2≤                | 1.187       | 0.644-2.187  | 0.582  | 1.318       | 0.862-2.013  | 0.202  | 1.305       | 0.982-1.735 | 0.066  | 1.173       | 0.999-1.376  | 0.051  |
|                    |                 | DM                | 0.768       | 0.421-1.399  | 0.388  | 0.792       | 0.526-1.193  | 0.265  | 0.792       | 0.599-1.046 | 0.1    | 0.886       | 0.761-1.031  | 0.117  |
|                    |                 | HTN               | 0.985       | 0.622-1.560  | 0.948  | 1.059       | 0.769-1.459  | 0.726  | 1.01        | 0.813-1.255 | 0.927  | 0.92        | 0.817-1.036  | 0.17   |
|                    | HLD             | 1.201             | 0.755-1.909 | 0.439        | 1.075  | 0.776-1.490 | 0.663        | 1.182  | 0.949-1.472 | 0.136       | 1.313  | 1.164-1.480 | <0.001       |        |
|                    | COPD            | 0.87              | 0.341-2.220 | 0.77         | 1.137  | 0.642-2.014 | 0.66         | 0.98   | 0.647-1.483 | 0.922       | 1.043  | 0.832-1.308 | 0.713        |        |
|                    | COVID19         | 1.006             | 0.140-7.201 | 0.996        | 1.444  | 0.462-4.510 | 0.528        | 1.09   | 0.452-2.631 | 0.848       | 1.116  | 0.692-1.799 | 0.654        |        |
| Inner ear disease  | Vaccine         | No                |             |              |        |             |              |        |             |             |        |             |              |        |
|                    |                 | only mRNA vaccine | 2.146       | 1.554-2.964  | <0.001 | 2.484       | 1.937-3.184  | <0.001 | 2.53        | 2.135-2.997 | <0.001 | 2.379       | 2.159-2.622  | <0.001 |
|                    |                 | only cDNA vaccine | 2.346       | 1.671-3.294  | <0.001 | 2.782       | 2.149-3.601  | <0.001 | 2.711       | 2.273-3.234 | <0.001 | 2.464       | 2.227-2.726  | <0.001 |
|                    |                 | Cross             | 2.282       | 1.454-3.581  | <0.001 | 2.277       | 1.603-3.234  | <0.001 | 2.25        | 1.769-2.861 | <0.001 | 2.125       | 1.847-2.444  | <0.001 |
|                    | Gender          | Female            | 2.141       | 1.798-2.551  | <0.001 | 2.019       | 1.784-2.285  | <0.001 | 1.91        | 1.757-2.075 | <0.001 | 2.005       | 1.908-2.106  | <0.001 |
|                    |                 | Age               | 1.009       | 1.003-1.016  | 0.003  | 1.012       | 1.008-1.017  | <0.001 | 1.013       | 1.010-1.016 | <0.001 | 1.014       | 1.013-1.016  | <0.001 |
|                    | Insurance Level | Low               |             |              |        |             |              |        |             |             |        |             |              |        |
|                    |                 | Middle            | 1.139       | 0.917-1.416  | 0.239  | 1.107       | 0.943-1.299  | 0.215  | 1.039       | 0.932-1.160 | 0.489  | 1.031       | 0.967-1.099  | 0.346  |
|                    |                 | High              | 0.989       | 0.810-1.208  | 0.912  | 1.111       | 0.963-1.282  | 0.151  | 1.103       | 1.002-1.214 | 0.046  | 1.051       | 0.994-1.112  | 0.082  |
|                    | CCI             | 0                 |             |              |        |             |              |        |             |             |        |             |              |        |
|                    |                 | 1                 | 1.049       | 0.818-1.345  | 0.706  | 1.072       | 0.899-1.278  | 0.437  | 1.09        | 0.967-1.228 | 0.158  | 1.151       | 1.074-1.234  | <0.001 |
|                    |                 | 2≤                | 0.937       | 0.694-1.263  | 0.668  | 0.994       | 0.806-1.224  | 0.951  | 1.056       | 0.918-1.215 | 0.444  | 1.174       | 1.084-1.272  | <0.001 |
|                    |                 | DM                | 0.742       | 0.555-0.992  | 0.044  | 0.771       | 0.630-0.942  | 0.011  | 0.835       | 0.731-0.953 | 0.008  | 0.77        | 0.712-0.832  | <0.001 |
|                    |                 | HTN               | 1.097       | 0.884-1.360  | 0.401  | 1.041       | 0.895-1.212  | 0.601  | 0.96        | 0.867-1.064 | 0.44   | 0.974       | 0.917-1.035  | 0.397  |
|                    | HLD             | 1.232             | 0.994-1.527 | 0.057        | 1.249  | 1.073-1.454 | 0.004        | 1.294  | 1.168-1.434 | <0.001      | 1.293  | 1.218-1.374 | <0.001       |        |
|                    | COPD            | 1.448             | 0.992-2.114 | 0.055        | 1.365  | 1.043-1.785 | 0.023        | 1.476  | 1.240-1.757 | <0.001      | 1.252  | 1.126-1.392 | <0.001       |        |
|                    | COVID19         | 0.658             | 0.212-2.047 | 0.47         | 1.358  | 0.769-2.401 | 0.292        | 1.127  | 0.740-1.716 | 0.577       | 1.281  | 1.014-1.617 | 0.038        |        |
| Middle ear disease | Vaccine         | No                |             |              |        |             |              |        |             |             |        |             |              |        |
|                    |                 | only mRNA vaccine | 2.784       | 1.595-4.861  | <0.001 | 2.161       | 1.557-2.998  | <0.001 | 2.169       | 1.741-2.703 | <0.001 | 2.253       | 1.989-2.552  | <0.001 |
|                    |                 | only cDNA vaccine | 2.745       | 1.524-4.944  | 0.001  | 1.918       | 1.340-2.744  | <0.001 | 2.069       | 1.629-2.628 | <0.001 | 2.178       | 1.902-2.494  | <0.001 |
|                    |                 | Cross             | 2.231       | 1.011-4.920  | 0.047  | 1.74        | 1.066-2.840  | 0.027  | 1.93        | 1.401-2.659 | <0.001 | 2.108       | 1.765-2.517  | <0.001 |
|                    | Gender          | Female            | 1.147       | 0.884-1.487  | 0.303  | 1.173       | 0.984-1.398  | 0.075  | 1.127       | 1.003-1.267 | 0.045  | 1.208       | 1.131-1.290  | <0.001 |
|                    |                 | Age               | 1.002       | 0.992-1.012  | 0.684  | 0.994       | 0.988-1.001  | 0.091  | 0.996       | 0.992-1.001 | 0.116  | 0.996       | 0.994-0.998  | 0.002  |
|                    | Insurance Level | Low               |             |              |        |             |              |        |             |             |        |             |              |        |
|                    |                 | Middle            | 1.132       | 0.793-1.617  | 0.495  | 1.138       | 0.897-1.444  | 0.286  | 1.078       | 0.919-1.264 | 0.357  | 1.038       | 0.949-1.136  | 0.411  |
|                    |                 | High              | 1.07        | 0.775-1.479  | 0.681  | 1.039       | 0.835-1.292  | 0.734  | 1.041       | 0.901-1.203 | 0.584  | 1.022       | 0.942-1.108  | 0.604  |
|                    | CCI             | 0                 |             |              |        |             |              |        |             |             |        |             |              |        |
|                    |                 | 1                 | 1.338       | 0.901-1.986  | 0.149  | 1.422       | 1.085-1.863  | 0.011  | 1.271       | 1.058-1.526 | 0.01   | 1.251       | 1.128-1.387  | <0.001 |
|                    |                 | 2≤                | 1.255       | 0.785-2.005  | 0.343  | 1.719       | 1.267-2.332  | <0.001 | 1.692       | 1.383-2.070 | <0.001 | 1.485       | 1.320-1.671  | <0.001 |
|                    |                 | DM                | 1.013       | 0.660-1.555  | 0.953  | 0.865       | 0.646-1.156  | 0.327  | 0.819       | 0.672-0.997 | 0.047  | 0.875       | 0.780-0.981  |        |

|                    |                 |        |              |             |       |              |             |       |             |             |       |             |             |       |  |
|--------------------|-----------------|--------|--------------|-------------|-------|--------------|-------------|-------|-------------|-------------|-------|-------------|-------------|-------|--|
| Peridontal disease | Insurance Level | Middle | 1.872        | 0.690-5.079 | 0.218 | 1.11         | 0.591-2.087 | 0.745 | 0.742       | 0.497-1.108 | 0.145 | 0.821       | 0.651-1.037 | 0.098 |  |
|                    |                 | High   | 1.758        | 0.696-4.441 | 0.233 | 1.141        | 0.655-1.988 | 0.642 | 0.733       | 0.520-1.033 | 0.076 | 0.78        | 0.638-0.954 | 0.016 |  |
|                    | CCI             | 0      |              |             |       |              |             |       |             |             |       |             |             |       |  |
|                    |                 | 1      | 0.878        | 0.281-2.743 | 0.822 | 1.062        | 0.507-2.225 | 0.874 | 1.303       | 0.817-2.080 | 0.266 | 1.364       | 1.052-1.768 | 0.019 |  |
|                    |                 | 2≤     | 1.754        | 0.566-5.439 | 0.33  | 2.03         | 0.974-4.231 | 0.059 | 2.153       | 1.332-3.480 | 0.002 | 1.5         | 1.124-2.003 | 0.006 |  |
|                    |                 |        |              |             |       |              |             |       |             |             |       |             |             |       |  |
|                    | DM              | 1.275  | 0.426-3.818  | 0.664       | 1.388 | 0.696-2.768  | 0.352       | 1.256 | 0.813-1.940 | 0.305       | 1.222 | 0.953-1.567 | 0.114       |       |  |
|                    | HTN             | 0.605  | 0.250-1.462  | 0.264       | 1.044 | 0.591-1.845  | 0.882       | 1.177 | 0.811-1.707 | 0.392       | 1.064 | 0.860-1.315 | 0.569       |       |  |
|                    | HLD             | 0.799  | 0.320-1.998  | 0.632       | 0.729 | 0.403-1.321  | 0.298       | 0.778 | 0.530-1.143 | 0.201       | 1.082 | 0.868-1.348 | 0.483       |       |  |
|                    | COPD            | 1.716  | 0.472-6.235  | 0.412       | 0.833 | 0.292-2.376  | 0.732       | 1.02  | 0.552-1.886 | 0.95        | 1.341 | 0.962-1.869 | 0.083       |       |  |
|                    | COVID19         | 3.402  | 0.463-25.001 | 0.229       | 3.277 | 0.802-13.393 | 0.098       | 2.743 | 1.015-7.411 | 0.047       | 1.858 | 0.923-3.740 | 0.083       |       |  |
