# Supplementary material for: Broad-spectrum of non-serious adverse events following COVID-19 vaccination: A population-based cohort study in Seoul, South Korea
Source: bioRxiv or medRxiv preprint supplement (doi:10.1101/2023.11.15.23298566), 2024-03-07
Supplement: Supplementary file [file media-1.pdf]

**eTable 1. The cumulative incidence rates of non-fatal immune-related adverse events stratified by gender**

| Disease             | Gender | Vaccination | total  | One week |      |           |        | Two weeks |       |             |        | One month |       |             |        | Three months |       |             |        |
|---------------------|--------|-------------|--------|----------|------|-----------|--------|-----------|-------|-------------|--------|-----------|-------|-------------|--------|--------------|-------|-------------|--------|
|                     |        |             |        | event    | IR   | 95% CI    | P      | event     | IR    | 95% CI      | P      | event     | IR    | 95% CI      | P      | event        | IR    | 95% CI      | P      |
| Endometriosis       | Male   | No          | 143128 |          |      |           |        |           |       |             |        |           |       |             |        |              |       |             |        |
|                     |        | Yes         | 718173 |          |      |           |        |           |       |             |        |           |       |             |        |              |       |             |        |
|                     | Female | No          | 146448 | 4        | 0.27 | 0.01-0.54 | 0.389  | 13        | 0.89  | 0.41-1.37   | 0.877  | 35        | 2.39  | 1.60-3.18   | 0.703  | 99           | 6.76  | 5.43-8.09   | 0.164  |
|                     |        | Yes         | 740384 | 34       | 0.46 | 0.30-0.61 |        | 63        | 0.85  | 0.64-1.06   |        | 165       | 2.23  | 1.89-2.57   |        | 584          | 7.89  | 7.25-8.53   |        |
| Menstrual disorder  | Male   | No          | 143128 |          |      |           |        |           |       |             |        |           |       |             |        |              |       |             |        |
|                     |        | Yes         | 718173 |          |      |           |        |           |       |             |        |           |       |             |        |              |       |             |        |
|                     | Female | No          | 146448 | 82       | 5.6  | 4.39-6.81 | 0.638  | 161       | 10.99 | 9.30-12.69  | 0.112  | 346       | 23.63 | 21.14-26.11 | 0.003  | 1025         | 69.99 | 65.72-74.26 | <0.001 |
|                     |        | Yes         | 740384 | 442      | 5.97 | 5.41-6.53 |        | 935       | 12.63 | 11.82-13.44 |        | 2081      | 28.11 | 26.90-29.31 |        | 6481         | 87.54 | 85.41-89.66 |        |
| Bruise              | Male   | No          | 143128 | 1        | 0.07 | 0.00-0.21 | 0.007  | 2         | 0.14  | 0.00-0.33   | 0.001  | 3         | 0.21  | 0.00-0.45   | <0.001 | 17           | 1.19  | 0.62-1.75   | <0.001 |
|                     |        | Yes         | 718173 | 42       | 0.58 | 0.41-0.76 |        | 65        | 0.91  | 0.69-1.13   |        | 108       | 1.5   | 1.22-1.79   |        | 218          | 3.04  | 2.63-3.44   |        |
|                     | Female | No          | 146448 | 3        | 0.2  | 0.00-0.44 | 0.005  | 4         | 0.27  | 0.01-0.54   | <0.001 | 8         | 0.55  | 0.17-0.92   | <0.001 | 31           | 2.12  | 1.37-2.86   | <0.001 |
|                     |        | Yes         | 740384 | 65       | 0.88 | 0.66-1.09 |        | 116       | 1.57  | 1.28-1.85   |        | 179       | 2.42  | 2.06-2.77   |        | 341          | 4.61  | 4.12-5.09   |        |
| Herpes zoster       | Male   | No          | 143128 | 8        | 0.56 | 0.17-0.95 | <0.001 | 21        | 1.47  | 0.84-2.09   | <0.001 | 59        | 4.12  | 3.07-5.17   | <0.001 | 179          | 12.51 | 10.68-14.34 | <0.001 |
|                     |        | Yes         | 718173 | 188      | 2.62 | 2.24-2.99 |        | 411       | 5.72  | 5.17-6.28   |        | 907       | 12.63 | 11.81-13.45 |        | 2641         | 36.77 | 35.37-38.17 |        |
|                     | Female | No          | 146448 | 23       | 1.57 | 0.93-2.21 | <0.001 | 45        | 3.07  | 2.18-3.97   | <0.001 | 103       | 7.03  | 5.68-8.39   | <0.001 | 275          | 18.78 | 16.56-21.00 | <0.001 |
|                     |        | Yes         | 740384 | 284      | 3.84 | 3.39-4.28 |        | 644       | 8.7   | 8.03-9.37   |        | 1363      | 18.41 | 17.43-19.39 |        | 3934         | 53.13 | 51.48-54.79 |        |
| Alopecia            | Male   | No          | 143128 | 2        | 0.14 | 0.00-0.33 | 0.053  | 5         | 0.35  | 0.04-0.66   | 0.047  | 11        | 0.77  | 0.31-1.22   | 0.001  | 38           | 2.65  | 1.81-3.50   | <0.001 |
|                     |        | Yes         | 718173 | 38       | 0.53 | 0.36-0.70 |        | 62        | 0.86  | 0.65-1.08   |        | 143       | 1.99  | 1.66-2.32   |        | 373          | 5.19  | 4.67-5.72   |        |
|                     | Female | No          | 146448 | 4        | 0.27 | 0.01-0.54 | 1      | 5         | 0.34  | 0.04-0.64   | 0.064  | 12        | 0.82  | 0.36-1.28   | 0.015  | 42           | 2.87  | 2.00-3.74   | <0.001 |
|                     |        | Yes         | 740384 | 23       | 0.31 | 0.18-0.44 |        | 60        | 0.81  | 0.61-1.02   |        | 123       | 1.66  | 1.37-1.95   |        | 393          | 5.31  | 4.78-5.83   |        |
| Warts               | Male   | No          | 143128 | 9        | 0.63 | 0.22-1.04 | 0.286  | 14        | 0.98  | 0.47-1.49   | 0.003  | 40        | 2.79  | 1.93-3.66   | <0.001 | 103          | 7.2   | 5.81-8.59   | <0.001 |
|                     |        | Yes         | 718173 | 68       | 0.95 | 0.72-1.17 |        | 156       | 2.17  | 1.83-2.51   |        | 349       | 4.86  | 4.35-5.37   |        | 983          | 13.69 | 12.83-14.54 |        |
|                     | Female | No          | 146448 | 11       | 0.75 | 0.31-1.19 | 0.649  | 16        | 1.09  | 0.56-1.63   | 0.02   | 38        | 2.59  | 1.77-3.42   | 0.005  | 94           | 6.42  | 5.12-7.72   | <0.001 |
|                     |        | Yes         | 740384 | 67       | 0.9  | 0.69-1.12 |        | 147       | 1.99  | 1.66-2.31   |        | 309       | 4.17  | 3.71-4.64   |        | 828          | 11.18 | 10.42-11.94 |        |
| Visual impairment   | Male   | No          | 143128 | 0        | 0    | 0.00-0.00 | 1      | 0         | 0     | 0.00-0.00   | 0.598  | 0         | 0     | 0.00-0.00   | 0.154  | 0            | 0     | 0.00-0.00   | 0.006  |
|                     |        | Yes         | 718173 | 3        | 0.04 | 0.00-0.09 |        | 6         | 0.08  | 0.02-0.15   |        | 15        | 0.21  | 0.10-0.31   |        | 31           | 0.43  | 0.28-0.58   |        |
|                     | Female | No          | 146448 | 0        | 0    | 0.00-0.00 | 1      | 0         | 0     | 0.00-0.00   | 1      | 0         | 0     | 0.00-0.00   | 0.368  | 2            | 0.14  | 0.00-0.33   | 0.561  |
|                     |        | Yes         | 740384 | 2        | 0.03 | 0.00-0.06 |        | 3         | 0.04  | 0.00-0.09   |        | 8         | 0.11  | 0.03-0.18   |        | 19           | 0.26  | 0.14-0.37   |        |
| Glaucoma            | Male   | No          | 143128 | 11       | 0.77 | 0.31-1.22 | <0.001 | 28        | 1.96  | 1.23-2.68   | <0.001 | 78        | 5.45  | 4.24-6.66   | <0.001 | 216          | 15.09 | 13.08-17.10 | <0.001 |
|                     |        | Yes         | 718173 | 198      | 2.76 | 2.37-3.14 |        | 393       | 5.47  | 4.93-6.01   |        | 849       | 11.82 | 11.03-12.62 |        | 2556         | 35.59 | 34.21-36.97 |        |
|                     | Female | No          | 146448 | 32       | 2.19 | 1.43-2.94 | 0.056  | 52        | 3.55  | 2.59-4.52   | <0.001 | 121       | 8.26  | 6.79-9.73   | <0.001 | 318          | 21.71 | 19.33-24.10 | <0.001 |
|                     |        | Yes         | 740384 | 232      | 3.13 | 2.73-3.54 |        | 508       | 6.86  | 6.26-7.46   |        | 1043      | 14.09 | 13.23-14.94 |        | 3193         | 43.13 | 41.63-44.62 |        |
| Tinnitus            | Male   | No          | 143128 | 5        | 0.35 | 0.04-0.66 | 0.197  | 12        | 0.84  | 0.36-1.31   | 0.081  | 25        | 1.75  | 1.06-2.43   | 0.001  | 73           | 5.1   | 3.93-6.27   | <0.001 |
|                     |        | Yes         | 718173 | 48       | 0.67 | 0.48-0.86 |        | 105       | 1.46  | 1.18-1.74   |        | 238       | 3.31  | 2.89-3.73   |        | 789          | 10.99 | 10.22-11.75 |        |
|                     | Female | No          | 146448 | 6        | 0.41 | 0.08-0.74 | 0.044  | 14        | 0.96  | 0.46-1.46   | 0.025  | 29        | 1.98  | 1.26-2.70   | <0.001 | 98           | 6.69  | 5.37-8.02   | <0.001 |
|                     |        | Yes         | 740384 | 71       | 0.96 | 0.74-1.18 |        | 132       | 1.78  | 1.48-2.09   |        | 296       | 4     | 3.54-4.45   |        | 1000         | 13.51 | 12.67-14.34 |        |
| Inner ear disease   | Male   | No          | 143128 | 13       | 0.91 | 0.41-1.40 | <0.001 | 20        | 1.4   | 0.78-2.01   | <0.001 | 48        | 3.35  | 2.41-4.30   | <0.001 | 147          | 10.27 | 8.61-11.93  | <0.001 |
|                     |        | Yes         | 718173 | 171      | 2.38 | 2.02-2.74 |        | 355       | 4.94  | 4.43-5.46   |        | 798       | 11.11 | 10.34-11.88 |        | 2219         | 30.9  | 29.61-32.18 |        |
|                     | Female | No          | 146448 | 30       | 2.05 | 1.32-2.78 | <0.001 | 51        | 3.48  | 2.53-4.44   | <0.001 | 104       | 7.1   | 5.74-8.47   | <0.001 | 319          | 21.78 | 19.39-24.17 | <0.001 |
|                     |        | Yes         | 740384 | 382      | 5.16 | 4.64-5.68 |        | 739       | 9.98  | 9.26-10.70  |        | 1583      | 21.38 | 20.33-22.43 |        | 4651         | 62.82 | 61.02-64.62 |        |
| Middle ear disease  | Male   | No          | 143128 | 5        | 0.35 | 0.04-0.66 | <0.001 | 15        | 1.05  | 0.52-1.58   | <0.001 | 39        | 2.72  | 1.87-3.58   | <0.001 | 126          | 8.8   | 7.27-10.34  | <0.001 |
|                     |        | Yes         | 718173 | 102      | 1.42 | 1.14-1.70 |        | 217       | 3.02  | 2.62-3.42   |        | 495       | 6.89  | 6.29-7.50   |        | 1495         | 20.82 | 19.76-21.87 |        |
|                     | Female | No          | 146448 | 9        | 0.61 | 0.21-1.02 | 0.004  | 27        | 1.84  | 1.15-2.54   | 0.002  | 54        | 3.69  | 2.70-4.67   | <0.001 | 164          | 11.2  | 9.49-12.91  | <0.001 |
|                     |        | Yes         | 740384 | 116      | 1.57 | 1.28-1.85 |        | 251       | 3.39  | 2.97-3.81   |        | 563       | 7.6   | 6.98-8.23   |        | 1848         | 24.96 | 23.82-26.10 |        |
| Other ear disease   | Male   | No          | 143128 | 19       | 1.33 | 0.73-1.92 | <0.001 | 32        | 2.24  | 1.46-3.01   | <0.001 | 84        | 5.87  | 4.61-7.12   | <0.001 | 267          | 18.65 | 16.42-20.89 | <0.001 |
|                     |        | Yes         | 718173 | 260      | 3.62 | 3.18-4.06 |        | 526       | 7.32  | 6.70-7.95   |        | 1134      | 15.79 | 14.87-16.71 |        | 3460         | 48.18 | 46.58-49.78 |        |
|                     | Female | No          | 146448 | 24       | 1.64 | 0.98-2.29 | <0.001 | 54        | 3.69  | 2.70-4.67   | <0.001 | 118       | 8.06  | 6.60-9.51   | <0.001 | 340          | 23.22 | 20.75-25.68 | <0.001 |
|                     |        | Yes         | 740384 | 290      | 3.92 | 3.47-4.37 |        | 586       | 7.91  | 7.27-8.56   |        | 1307      | 17.65 | 16.70-18.61 |        | 4092         | 55.27 | 53.58-56.96 |        |
| Periodontal disease | Male   | No          | 143128 | 0        | 0    | 0.00-0.00 | 0.037  | 0         | 0     | 0.00-0.00   | 0.003  | 5         | 0.35  | 0.04-0.66   | 0.01   | 11           | 0.77  | 0.31-1.22   | <0.001 |
|                     |        | Yes         | 718173 | 21       | 0.29 | 0.17-0.42 |        | 36        | 0.5   | 0.34-0.67   |        | 75        | 1.04  | 0.81-1.28   |        | 247          | 3.44  | 3.01-3.87   |        |
|                     | Female | No          | 146448 | 5        | 0.34 | 0.04-0.64 | 0.067  | 6         | 0.41  | 0.08-0.74   | 1      | 9         | 0.61  | 0.21-1.02   | 0.071  | 20           | 1.37  | 0.77-1.96   | <0.001 |
|                     |        | Yes         | 740384 | 9        | 0.12 | 0.04-0.20 |        | 34        | 0.46  | 0.30-0.61   |        | 85        | 1.15  | 0.90-1.39   |        | 241          | 3.26  | 2.84-3.67   |        |

**eTable 2. The cumulative incidence rates of non-fatal immune-related adverse events stratified by vaccine type**

| Disease             | Vaccination       | total  | One week |      |           |          | Two weeks |       |            |          | One month |       |             |          | Three months |       |             |          |
|---------------------|-------------------|--------|----------|------|-----------|----------|-----------|-------|------------|----------|-----------|-------|-------------|----------|--------------|-------|-------------|----------|
|                     |                   |        | event    | IR   | 95% CI    | <i>P</i> | event     | IR    | 95% CI     | <i>P</i> | event     | IR    | 95% CI      | <i>P</i> | event        | IR    | 95% CI      | <i>P</i> |
| Endometriosis       | No                | 289576 | 4        | 0.14 | 0.00-0.27 | 0.264    | 13        | 0.45  | 0.20-0.69  | 0.213    | 35        | 1.21  | 0.81-1.61   | 0.002    | 99           | 3.42  | 2.75-4.09   | <0.001   |
|                     | only mRNA vaccine | 849526 | 22       | 0.26 | 0.15-0.37 |          | 41        | 0.48  | 0.33-0.63  |          | 109       | 1.28  | 1.04-1.52   |          | 401          | 4.72  | 4.26-5.18   |          |
|                     | only cDNA vaccine | 510253 | 8        | 0.16 | 0.05-0.27 |          | 15        | 0.29  | 0.15-0.44  |          | 37        | 0.73  | 0.49-0.96   |          | 97           | 1.9   | 1.52-2.28   |          |
|                     | Cross             | 98778  | 4        | 0.4  | 0.01-0.80 |          | 7         | 0.71  | 0.18-1.23  |          | 19        | 1.92  | 1.06-2.79   |          | 86           | 8.71  | 6.87-10.55  |          |
| Menstrual disorder  | No                | 289576 | 82       | 2.83 | 2.22-3.44 | <0.001   | 161       | 5.56  | 4.70-6.42  | <0.001   | 346       | 11.95 | 10.69-13.21 | <0.001   | 1025         | 35.4  | 33.23-37.56 | <0.001   |
|                     | only mRNA vaccine | 849526 | 334      | 3.93 | 3.51-4.35 |          | 685       | 8.06  | 7.46-8.67  |          | 1533      | 18.05 | 17.14-18.95 |          | 4891         | 57.57 | 55.96-59.18 |          |
|                     | only cDNA vaccine | 510253 | 63       | 1.23 | 0.93-1.54 |          | 138       | 2.7   | 2.25-3.16  |          | 281       | 5.51  | 4.86-6.15   |          | 810          | 15.87 | 14.78-16.97 |          |
|                     | Cross             | 98778  | 45       | 4.56 | 3.22-5.89 |          | 112       | 11.34 | 9.24-13.44 |          | 267       | 27.03 | 23.79-30.27 |          | 780          | 78.96 | 73.45-84.48 |          |
| Bruise              | No                | 289576 | 4        | 0.14 | 0.00-0.27 | <0.001   | 6         | 0.21  | 0.04-0.37  | <0.001   | 11        | 0.38  | 0.16-0.60   | <0.001   | 48           | 1.66  | 1.19-2.13   | <0.001   |
|                     | only mRNA vaccine | 849526 | 56       | 0.66 | 0.49-0.83 |          | 86        | 1.01  | 0.80-1.23  |          | 142       | 1.67  | 1.40-1.95   |          | 296          | 3.48  | 3.09-3.88   |          |
|                     | only cDNA vaccine | 510253 | 47       | 0.92 | 0.66-1.18 |          | 87        | 1.71  | 1.35-2.06  |          | 131       | 2.57  | 2.13-3.01   |          | 231          | 4.53  | 3.94-5.11   |          |
|                     | Cross             | 98778  | 4        | 0.4  | 0.01-0.80 |          | 8         | 0.81  | 0.25-1.37  |          | 14        | 1.42  | 0.67-2.16   |          | 32           | 3.24  | 2.12-4.36   |          |
| Herpes zoster       | No                | 289576 | 31       | 1.07 | 0.69-1.45 | <0.001   | 66        | 2.28  | 1.73-2.83  | <0.001   | 162       | 5.59  | 4.73-6.46   | <0.001   | 454          | 15.68 | 14.24-17.12 | <0.001   |
|                     | only mRNA vaccine | 849526 | 237      | 2.79 | 2.43-3.14 |          | 535       | 6.3   | 5.76-6.83  |          | 1136      | 13.37 | 12.60-14.15 |          | 3365         | 39.61 | 38.27-40.95 |          |
|                     | only cDNA vaccine | 510253 | 215      | 4.21 | 3.65-4.78 |          | 463       | 9.07  | 8.25-9.90  |          | 987       | 19.34 | 18.14-20.55 |          | 2760         | 54.09 | 52.08-56.10 |          |
|                     | Cross             | 98778  | 20       | 2.02 | 1.14-2.91 |          | 57        | 5.77  | 4.27-7.27  |          | 147       | 14.88 | 12.48-17.29 |          | 450          | 45.56 | 41.36-49.76 |          |
| Alopecia            | No                | 289576 | 6        | 0.21 | 0.04-0.37 | 0.024    | 10        | 0.35  | 0.13-0.56  | 0.001    | 23        | 0.79  | 0.47-1.12   | <0.001   | 80           | 2.76  | 2.16-3.37   | <0.001   |
|                     | only mRNA vaccine | 849526 | 41       | 0.48 | 0.33-0.63 |          | 82        | 0.97  | 0.76-1.17  |          | 175       | 2.06  | 1.75-2.37   |          | 482          | 5.67  | 5.17-6.18   |          |
|                     | only cDNA vaccine | 510253 | 13       | 0.25 | 0.12-0.39 |          | 28        | 0.55  | 0.35-0.75  |          | 63        | 1.23  | 0.93-1.54   |          | 195          | 3.82  | 3.29-4.36   |          |
|                     | Cross             | 98778  | 7        | 0.71 | 0.18-1.23 |          | 12        | 1.21  | 0.53-1.90  |          | 28        | 2.83  | 1.78-3.88   |          | 89           | 9.01  | 7.14-10.88  |          |
| Warts               | No                | 289576 | 20       | 0.69 | 0.39-0.99 | 0.052    | 30        | 1.04  | 0.67-1.41  | <0.001   | 78        | 2.69  | 2.10-3.29   | <0.001   | 197          | 6.8   | 5.85-7.75   | <0.001   |
|                     | only mRNA vaccine | 849526 | 89       | 1.05 | 0.83-1.27 |          | 197       | 2.32  | 2.00-2.64  |          | 433       | 5.1   | 4.62-5.58   |          | 1157         | 13.62 | 12.84-14.40 |          |
|                     | only cDNA vaccine | 510253 | 34       | 0.67 | 0.44-0.89 |          | 79        | 1.55  | 1.21-1.89  |          | 173       | 3.39  | 2.89-3.90   |          | 504          | 9.88  | 9.02-10.74  |          |
|                     | Cross             | 98778  | 12       | 1.21 | 0.53-1.90 |          | 27        | 2.73  | 1.70-3.76  |          | 52        | 5.26  | 3.83-6.69   |          | 150          | 15.19 | 12.76-17.61 |          |
| Visual impairment   | No                | 289576 | 0        | 0    | 0.00-0.00 | 0.421    | 0         | 0     | 0.00-0.00  | 0.08     | 0         | 0     | 0.00-0.00   | 0.012    | 2            | 0.07  | 0.00-0.16   | <0.001   |
|                     | only mRNA vaccine | 849526 | 2        | 0.02 | 0.00-0.06 |          | 3         | 0.04  | 0.00-0.08  |          | 8         | 0.09  | 0.03-0.16   |          | 18           | 0.21  | 0.11-0.31   |          |
|                     | only cDNA vaccine | 510253 | 3        | 0.06 | 0.00-0.13 |          | 6         | 0.12  | 0.02-0.21  |          | 13        | 0.25  | 0.12-0.39   |          | 30           | 0.59  | 0.38-0.80   |          |
|                     | Cross             | 98778  | 0        | 0    | 0.00-0.00 |          | 0         | 0     | 0.00-0.00  |          | 2         | 0.2   | 0.00-0.48   |          | 2            | 0.2   | 0.00-0.48   |          |
| Glaucoma            | No                | 289576 | 43       | 1.48 | 1.04-1.93 | <0.001   | 80        | 2.76  | 2.16-3.37  | <0.001   | 199       | 6.87  | 5.92-7.83   | <0.001   | 534          | 18.44 | 16.88-20.00 | <0.001   |
|                     | only mRNA vaccine | 849526 | 218      | 2.57 | 2.23-2.91 |          | 449       | 5.29  | 4.80-5.77  |          | 966       | 11.37 | 10.65-12.09 |          | 3034         | 35.71 | 34.45-36.98 |          |
|                     | only cDNA vaccine | 510253 | 186      | 3.65 | 3.12-4.17 |          | 389       | 7.62  | 6.87-8.38  |          | 798       | 15.64 | 14.56-16.72 |          | 2367         | 46.39 | 44.52-48.25 |          |
|                     | Cross             | 98778  | 26       | 2.63 | 1.62-3.64 |          | 63        | 6.38  | 4.80-7.95  |          | 128       | 12.96 | 10.71-15.20 |          | 348          | 35.23 | 31.54-38.93 |          |
| Tinnitus            | No                | 289576 | 11       | 0.38 | 0.16-0.60 | 0.019    | 26        | 0.9   | 0.55-1.24  | 0.002    | 54        | 1.86  | 1.37-2.36   | <0.001   | 171          | 5.91  | 5.02-6.79   | <0.001   |
|                     | only mRNA vaccine | 849526 | 72       | 0.85 | 0.65-1.04 |          | 138       | 1.62  | 1.35-1.90  |          | 316       | 3.72  | 3.31-4.13   |          | 991          | 11.67 | 10.94-12.39 |          |
|                     | only cDNA vaccine | 510253 | 44       | 0.86 | 0.61-1.12 |          | 92        | 1.8   | 1.43-2.17  |          | 195       | 3.82  | 3.29-4.36   |          | 708          | 13.88 | 12.85-14.90 |          |
|                     | Cross             | 98778  | 3        | 0.3  | 0.00-0.65 |          | 7         | 0.71  | 0.18-1.23  |          | 23        | 2.33  | 1.38-3.28   |          | 90           | 9.11  | 7.23-10.99  |          |
| Inner ear disease   | No                | 289576 | 43       | 1.48 | 1.04-1.93 | <0.001   | 71        | 2.45  | 1.88-3.02  | <0.001   | 152       | 5.25  | 4.41-6.08   | <0.001   | 466          | 16.09 | 14.63-17.55 | <0.001   |
|                     | only mRNA vaccine | 849526 | 297      | 3.5  | 3.10-3.89 |          | 582       | 6.85  | 6.29-7.41  |          | 1285      | 15.13 | 14.30-15.95 |          | 3735         | 43.97 | 42.56-45.37 |          |
|                     | only cDNA vaccine | 510253 | 222      | 4.35 | 3.78-4.92 |          | 456       | 8.94  | 8.12-9.76  |          | 977       | 19.15 | 17.95-20.35 |          | 2793         | 54.74 | 52.71-56.76 |          |
|                     | Cross             | 98778  | 34       | 3.44 | 2.29-4.60 |          | 56        | 5.67  | 4.18-7.15  |          | 119       | 12.05 | 9.88-14.21  |          | 342          | 34.62 | 30.96-38.29 |          |
| Middle ear disease  | No                | 289576 | 14       | 0.48 | 0.23-0.74 | <0.001   | 42        | 1.45  | 1.01-1.89  | <0.001   | 93        | 3.21  | 2.56-3.86   | <0.001   | 290          | 10.01 | 8.86-11.17  | <0.001   |
|                     | only mRNA vaccine | 849526 | 125      | 1.47 | 1.21-1.73 |          | 284       | 3.34  | 2.95-3.73  |          | 623       | 7.33  | 6.76-7.91   |          | 1973         | 23.22 | 22.20-24.25 |          |
|                     | only cDNA vaccine | 510253 | 82       | 1.61 | 1.26-1.95 |          | 158       | 3.1   | 2.61-3.58  |          | 372       | 7.29  | 6.55-8.03   |          | 1157         | 22.68 | 21.37-23.98 |          |
|                     | Cross             | 98778  | 11       | 1.11 | 0.46-1.77 |          | 26        | 2.63  | 1.62-3.64  |          | 63        | 6.38  | 4.80-7.95   |          | 213          | 21.56 | 18.67-24.46 |          |
| Other ear disease   | No                | 289576 | 43       | 1.48 | 1.04-1.93 | <0.001   | 86        | 2.97  | 2.34-3.60  | <0.001   | 202       | 6.98  | 6.01-7.94   | <0.001   | 607          | 20.96 | 19.30-22.63 | <0.001   |
|                     | only mRNA vaccine | 849526 | 323      | 3.8  | 3.39-4.22 |          | 655       | 7.71  | 7.12-8.30  |          | 1448      | 17.04 | 16.17-17.92 |          | 4309         | 50.72 | 49.21-52.23 |          |
|                     | only cDNA vaccine | 510253 | 200      | 3.92 | 3.38-4.46 |          | 408       | 8     | 7.22-8.77  |          | 886       | 17.36 | 16.22-18.51 |          | 2881         | 56.46 | 54.41-58.52 |          |
|                     | Cross             | 98778  | 27       | 2.73 | 1.70-3.76 |          | 49        | 4.96  | 3.57-6.35  |          | 107       | 10.83 | 8.78-12.88  |          | 362          | 36.65 | 32.88-40.42 |          |
| Periodontal disease | No                | 289576 | 5        | 0.17 | 0.02-0.32 | 0.081    | 6         | 0.21  | 0.04-0.37  | <0.001   | 14        | 0.48  | 0.23-0.74   | <0.001   | 31           | 1.07  | 0.69-1.45   | <0.001   |
|                     | only mRNA vaccine | 849526 | 11       | 0.13 | 0.05-0.21 |          | 26        | 0.31  | 0.19-0.42  |          | 65        | 0.77  | 0.58-0.95   |          | 226          | 2.66  | 2.31-3.01   |          |
|                     | only cDNA vaccine | 510253 | 17       | 0.33 | 0.17-0.49 |          | 37        | 0.73  | 0.49-0.96  |          | 82        | 1.61  | 1.26-1.95   |          | 228          | 4.47  | 3.89-5.05   |          |
|                     | Cross             | 98778  | 2        | 0.2  | 0.00-0.48 |          | 7         | 0.71  | 0.18-1.23  |          | 13        | 1.32  | 0.60-2.03   |          | 34           | 3.44  | 2.29-4.60   |          |
